# Supplementary material for: Separation of carbon dioxide and nitrogen gases through modified boron nitride nanosheets as a membrane: insights from molecular dynamics simulations
Source: Royal Society of Chemistry journal article supplement (doi:10.1039/c6ra18396d), 2016-01-01
Supplement: c6ra18396d1.pdf [file c6ra18396d1.pdf]

## Supporting Information

# Separation of Carbon Dioxide and Nitrogen Gases through Modified Boron Nitride Nanosheets as a Membrane: Insights from Molecular Dynamics Simulations

**Jafar Azamat,<sup>a</sup> Alireza Khataee,<sup>a,b,\*</sup> Fahreddin Sadikoglu<sup>c</sup>**

<sup>a</sup>*Research Laboratory of Advanced Water and Wastewater Treatment Processes, Department of Applied Chemistry, Faculty of Chemistry, University of Tabriz, 51666-16471 Tabriz, Iran*

<sup>b</sup>*Department of Materials Science and Nanotechnology, Near East University, 99138 Nicosia, North Cyprus, Mersin 10, Turkey*

<sup>c</sup>*Department of Electrical and Electronic Engineering, Near East University, 99138 Nicosia, North Cyprus, Mersin 10, Turkey*

*Corresponding author: E-mail address: a\_khataee@tabrizu.ac.ir Tel.: +98 4133393165; Fax: +98 4133340191*

**Table S1.** Parameters for the 12–6 Lennard–Jones potential used in the simulations.

| molecule        | site | $\epsilon$ (kcal/mol) | $R_{\min}/2$ (Å) | bond length (Å)         |
|-----------------|------|-----------------------|------------------|-------------------------|
| CO <sub>2</sub> | C    | 0.054                 | 1.571            | $l_{\text{C-O}} = 1.16$ |
|                 | O    | 0.157                 | 1.711            |                         |
| N <sub>2</sub>  | N    | 0.072                 | 1.857            | $l_{\text{N-N}} = 1.10$ |
|                 | COM* | 0                     | 0                |                         |
| BNNS            | B    | 0.950                 | 2.840            | $l_{\text{B-N}} = 1.44$ |
|                 | N    | 0.077                 | 0.468            | $l_{\text{B-H}} = 1.20$ |
|                 | O    | 0.152                 | 1.768            | $l_{\text{N-F}} = 1.39$ |
|                 | F    | 0.135                 | 1.630            | $l_{\text{N-O}} = 1.47$ |
|                 | H    | 0.028                 | 1.280            | $l_{\text{O-H}} = 0.99$ |

\*COM: center of mass site

**Cartesian coordinates (Å) for all geometries and together with their corresponding DFT energies.**

**Pore 1.** (The final potential energy from DFT calculations: -14089.10 Hartree)

|   |               |               |             |
|---|---------------|---------------|-------------|
| B | -15.314000000 | -15.528000000 | 0.000000000 |
| N | -16.535000000 | -16.233000000 | 0.000000000 |
| N | -15.314000000 | -14.118000000 | 0.000000000 |
| B | -16.535000000 | -13.413000000 | 0.000000000 |
| B | -15.314000000 | -11.298000000 | 0.000000000 |
| N | -16.535000000 | -12.003000000 | 0.000000000 |
| N | -15.314000000 | -9.888000000  | 0.000000000 |
| B | -16.535000000 | -9.183000000  | 0.000000000 |
| B | -15.314000000 | -7.068000000  | 0.000000000 |
| N | -16.535000000 | -7.773000000  | 0.000000000 |
| N | -15.314000000 | -5.658000000  | 0.000000000 |
| B | -16.535000000 | -4.953000000  | 0.000000000 |
| B | -15.314000000 | -2.838000000  | 0.000000000 |
| N | -16.535000000 | -3.543000000  | 0.000000000 |
| N | -15.314000000 | -1.428000000  | 0.000000000 |
| B | -16.535000000 | -0.723000000  | 0.000000000 |
| B | -15.314000000 | 1.392000000   | 0.000000000 |
| N | -16.535000000 | 0.687000000   | 0.000000000 |
| N | -15.314000000 | 2.802000000   | 0.000000000 |
| B | -16.535000000 | 3.507000000   | 0.000000000 |
| B | -15.314000000 | 5.622000000   | 0.000000000 |
| N | -16.535000000 | 4.917000000   | 0.000000000 |
| N | -15.314000000 | 7.032000000   | 0.000000000 |
| B | -16.535000000 | 7.737000000   | 0.000000000 |
| B | -15.314000000 | 9.852000000   | 0.000000000 |
| N | -16.535000000 | 9.147000000   | 0.000000000 |
| N | -15.314000000 | 11.262000000  | 0.000000000 |
| B | -16.535000000 | 11.967000000  | 0.000000000 |
| B | -15.314000000 | 14.082000000  | 0.000000000 |
| N | -16.535000000 | 13.377000000  | 0.000000000 |
| N | -15.314000000 | 15.492000000  | 0.000000000 |
| B | -16.535000000 | 16.197000000  | 0.000000000 |
| B | -12.872000000 | -15.528000000 | 0.000000000 |
| N | -14.093000000 | -16.233000000 | 0.000000000 |
| N | -12.872000000 | -14.118000000 | 0.000000000 |
| B | -14.093000000 | -13.413000000 | 0.000000000 |
| B | -12.872000000 | -11.298000000 | 0.000000000 |
| N | -14.093000000 | -12.003000000 | 0.000000000 |
| N | -12.872000000 | -9.888000000  | 0.000000000 |
| B | -14.093000000 | -9.183000000  | 0.000000000 |
| B | -12.872000000 | -7.068000000  | 0.000000000 |
| N | -14.093000000 | -7.773000000  | 0.000000000 |
| N | -12.872000000 | -5.658000000  | 0.000000000 |
| B | -14.093000000 | -4.953000000  | 0.000000000 |
| B | -12.872000000 | -2.838000000  | 0.000000000 |
| N | -14.093000000 | -3.543000000  | 0.000000000 |
| N | -12.872000000 | -1.428000000  | 0.000000000 |
| B | -14.093000000 | -0.723000000  | 0.000000000 |
| B | -12.872000000 | 1.392000000   | 0.000000000 |
| N | -14.093000000 | 0.687000000   | 0.000000000 |
| N | -12.872000000 | 2.802000000   | 0.000000000 |
| B | -14.093000000 | 3.507000000   | 0.000000000 |
| B | -12.872000000 | 5.622000000   | 0.000000000 |
| N | -14.093000000 | 4.917000000   | 0.000000000 |
| N | -12.872000000 | 7.032000000   | 0.000000000 |
| B | -14.093000000 | 7.737000000   | 0.000000000 |
| B | -12.872000000 | 9.852000000   | 0.000000000 |
| N | -14.093000000 | 9.147000000   | 0.000000000 |
| N | -12.872000000 | 11.262000000  | 0.000000000 |
| B | -14.093000000 | 11.967000000  | 0.000000000 |
| B | -12.872000000 | 14.082000000  | 0.000000000 |
| N | -14.093000000 | 13.377000000  | 0.000000000 |
| N | -12.872000000 | 15.492000000  | 0.000000000 |

|   |                |                |              |
|---|----------------|----------------|--------------|
| B | -14.0930000000 | 16.1970000000  | 0.0000000000 |
| B | -10.4300000000 | -15.5280000000 | 0.0000000000 |
| N | -11.6510000000 | -16.2330000000 | 0.0000000000 |
| N | -10.4300000000 | -14.1180000000 | 0.0000000000 |
| B | -11.6510000000 | -13.4130000000 | 0.0000000000 |
| B | -10.4300000000 | -11.2980000000 | 0.0000000000 |
| N | -11.6510000000 | -12.0030000000 | 0.0000000000 |
| N | -10.4300000000 | -9.8880000000  | 0.0000000000 |
| B | -11.6510000000 | -9.1830000000  | 0.0000000000 |
| B | -10.4300000000 | -7.0680000000  | 0.0000000000 |
| N | -11.6510000000 | -7.7730000000  | 0.0000000000 |
| N | -10.4300000000 | -5.6580000000  | 0.0000000000 |
| B | -11.6510000000 | -4.9530000000  | 0.0000000000 |
| B | -10.4300000000 | -2.8380000000  | 0.0000000000 |
| N | -11.6510000000 | -3.5430000000  | 0.0000000000 |
| N | -10.4300000000 | -1.4280000000  | 0.0000000000 |
| B | -11.6510000000 | -0.7230000000  | 0.0000000000 |
| B | -10.4300000000 | 1.3920000000   | 0.0000000000 |
| N | -11.6510000000 | 0.6870000000   | 0.0000000000 |
| N | -10.4300000000 | 2.8020000000   | 0.0000000000 |
| B | -11.6510000000 | 3.5070000000   | 0.0000000000 |
| B | -10.4300000000 | 5.6220000000   | 0.0000000000 |
| N | -11.6510000000 | 4.9170000000   | 0.0000000000 |
| N | -10.4300000000 | 7.0320000000   | 0.0000000000 |
| B | -11.6510000000 | 7.7370000000   | 0.0000000000 |
| B | -10.4300000000 | 9.8520000000   | 0.0000000000 |
| N | -11.6510000000 | 9.1470000000   | 0.0000000000 |
| N | -10.4300000000 | 11.2620000000  | 0.0000000000 |
| B | -11.6510000000 | 11.9670000000  | 0.0000000000 |
| B | -10.4300000000 | 14.0820000000  | 0.0000000000 |
| N | -11.6510000000 | 13.3770000000  | 0.0000000000 |
| N | -10.4300000000 | 15.4920000000  | 0.0000000000 |
| B | -11.6510000000 | 16.1970000000  | 0.0000000000 |
| B | -7.9870000000  | -15.5280000000 | 0.0000000000 |
| N | -9.2080000000  | -16.2330000000 | 0.0000000000 |
| N | -7.9870000000  | -14.1180000000 | 0.0000000000 |
| B | -9.2080000000  | -13.4130000000 | 0.0000000000 |
| B | -7.9870000000  | -11.2980000000 | 0.0000000000 |
| N | -9.2080000000  | -12.0030000000 | 0.0000000000 |
| N | -7.9870000000  | -9.8880000000  | 0.0000000000 |
| B | -9.2080000000  | -9.1830000000  | 0.0000000000 |
| B | -7.9870000000  | -7.0680000000  | 0.0000000000 |
| N | -9.2080000000  | -7.7730000000  | 0.0000000000 |
| N | -7.9870000000  | -5.6580000000  | 0.0000000000 |
| B | -9.2080000000  | -4.9530000000  | 0.0000000000 |
| B | -7.9870000000  | -2.8380000000  | 0.0000000000 |
| N | -9.2080000000  | -3.5430000000  | 0.0000000000 |
| N | -7.9870000000  | -1.4280000000  | 0.0000000000 |
| B | -9.2080000000  | -0.7230000000  | 0.0000000000 |
| B | -7.9870000000  | 1.3920000000   | 0.0000000000 |
| N | -9.2080000000  | 0.6870000000   | 0.0000000000 |
| N | -7.9870000000  | 2.8020000000   | 0.0000000000 |
| B | -9.2080000000  | 3.5070000000   | 0.0000000000 |
| B | -7.9870000000  | 5.6220000000   | 0.0000000000 |
| N | -9.2080000000  | 4.9170000000   | 0.0000000000 |
| N | -7.9870000000  | 7.0320000000   | 0.0000000000 |
| B | -9.2080000000  | 7.7370000000   | 0.0000000000 |
| B | -7.9870000000  | 9.8520000000   | 0.0000000000 |
| N | -9.2080000000  | 9.1470000000   | 0.0000000000 |
| N | -7.9870000000  | 11.2620000000  | 0.0000000000 |
| B | -9.2080000000  | 11.9670000000  | 0.0000000000 |
| B | -7.9870000000  | 14.0820000000  | 0.0000000000 |
| N | -9.2080000000  | 13.3770000000  | 0.0000000000 |
| N | -7.9870000000  | 15.4920000000  | 0.0000000000 |
| B | -9.2080000000  | 16.1970000000  | 0.0000000000 |
| B | -5.5450000000  | -15.5280000000 | 0.0000000000 |
| N | -6.7660000000  | -16.2330000000 | 0.0000000000 |
| N | -5.5450000000  | -14.1180000000 | 0.0000000000 |
| B | -6.7660000000  | -13.4130000000 | 0.0000000000 |
| B | -5.5450000000  | -11.2980000000 | 0.0000000000 |
| N | -6.7660000000  | -12.0030000000 | 0.0000000000 |
| N | -5.5450000000  | -9.8880000000  | 0.0000000000 |
| B | -6.7660000000  | -9.1830000000  | 0.0000000000 |
| B | -5.5450000000  | -7.0680000000  | 0.0000000000 |
| N | -6.7660000000  | -7.7730000000  | 0.0000000000 |

|   |              |               |             |
|---|--------------|---------------|-------------|
| N | -5.545000000 | -5.658000000  | 0.000000000 |
| B | -6.766000000 | -4.953000000  | 0.000000000 |
| B | -5.545000000 | -2.838000000  | 0.000000000 |
| N | -6.766000000 | -3.543000000  | 0.000000000 |
| N | -5.545000000 | -1.428000000  | 0.000000000 |
| B | -6.766000000 | -0.723000000  | 0.000000000 |
| B | -5.545000000 | 1.392000000   | 0.000000000 |
| N | -6.766000000 | 0.687000000   | 0.000000000 |
| N | -5.545000000 | 2.802000000   | 0.000000000 |
| B | -6.766000000 | 3.507000000   | 0.000000000 |
| B | -5.545000000 | 5.622000000   | 0.000000000 |
| N | -6.766000000 | 4.917000000   | 0.000000000 |
| N | -5.545000000 | 7.032000000   | 0.000000000 |
| B | -6.766000000 | 7.737000000   | 0.000000000 |
| B | -5.545000000 | 9.852000000   | 0.000000000 |
| N | -6.766000000 | 9.147000000   | 0.000000000 |
| N | -5.545000000 | 11.262000000  | 0.000000000 |
| B | -6.766000000 | 11.967000000  | 0.000000000 |
| B | -5.545000000 | 14.082000000  | 0.000000000 |
| N | -6.766000000 | 13.377000000  | 0.000000000 |
| N | -5.545000000 | 15.492000000  | 0.000000000 |
| B | -6.766000000 | 16.197000000  | 0.000000000 |
| B | -3.103000000 | -15.528000000 | 0.000000000 |
| N | -4.324000000 | -16.233000000 | 0.000000000 |
| N | -3.103000000 | -14.118000000 | 0.000000000 |
| B | -4.324000000 | -13.413000000 | 0.000000000 |
| B | -3.103000000 | -11.298000000 | 0.000000000 |
| N | -4.324000000 | -12.003000000 | 0.000000000 |
| N | -3.103000000 | -9.888000000  | 0.000000000 |
| B | -4.324000000 | -9.183000000  | 0.000000000 |
| B | -3.103000000 | -7.068000000  | 0.000000000 |
| N | -4.324000000 | -7.773000000  | 0.000000000 |
| N | -3.103000000 | -5.658000000  | 0.000000000 |
| B | -4.324000000 | -4.953000000  | 0.000000000 |
| N | -4.324000000 | -3.543000000  | 0.000000000 |
| N | -3.103000000 | 2.802000000   | 0.000000000 |
| B | -4.324000000 | 3.507000000   | 0.000000000 |
| B | -3.103000000 | 5.622000000   | 0.000000000 |
| N | -4.324000000 | 4.917000000   | 0.000000000 |
| N | -3.103000000 | 7.032000000   | 0.000000000 |
| B | -4.324000000 | 7.737000000   | 0.000000000 |
| B | -3.103000000 | 9.852000000   | 0.000000000 |
| N | -4.324000000 | 9.147000000   | 0.000000000 |
| N | -3.103000000 | 11.262000000  | 0.000000000 |
| B | -4.324000000 | 11.967000000  | 0.000000000 |
| B | -3.103000000 | 14.082000000  | 0.000000000 |
| N | -4.324000000 | 13.377000000  | 0.000000000 |
| N | -3.103000000 | 15.492000000  | 0.000000000 |
| B | -4.324000000 | 16.197000000  | 0.000000000 |
| B | -0.661000000 | -15.528000000 | 0.000000000 |
| N | -1.882000000 | -16.233000000 | 0.000000000 |
| N | -0.661000000 | -14.118000000 | 0.000000000 |
| B | -1.882000000 | -13.413000000 | 0.000000000 |
| B | -0.661000000 | -11.298000000 | 0.000000000 |
| N | -1.882000000 | -12.003000000 | 0.000000000 |
| N | -0.661000000 | -9.888000000  | 0.000000000 |
| B | -1.882000000 | -9.183000000  | 0.000000000 |
| B | -0.661000000 | -7.068000000  | 0.000000000 |
| N | -1.882000000 | -7.773000000  | 0.000000000 |
| N | -0.661000000 | -5.658000000  | 0.000000000 |
| B | -1.882000000 | -4.953000000  | 0.000000000 |
| N | -0.661000000 | 2.802000000   | 0.000000000 |
| B | -1.882000000 | 3.507000000   | 0.000000000 |
| B | -0.661000000 | 5.622000000   | 0.000000000 |
| N | -1.882000000 | 4.917000000   | 0.000000000 |
| N | -0.661000000 | 7.032000000   | 0.000000000 |
| B | -1.882000000 | 7.737000000   | 0.000000000 |
| B | -0.661000000 | 9.852000000   | 0.000000000 |
| N | -1.882000000 | 9.147000000   | 0.000000000 |
| N | -0.661000000 | 11.262000000  | 0.000000000 |
| B | -1.882000000 | 11.967000000  | 0.000000000 |
| B | -0.661000000 | 14.082000000  | 0.000000000 |
| N | -1.882000000 | 13.377000000  | 0.000000000 |
| N | -0.661000000 | 15.492000000  | 0.000000000 |
| B | -1.882000000 | 16.197000000  | 0.000000000 |

|   |             |               |             |
|---|-------------|---------------|-------------|
| B | 1.781000000 | -15.528000000 | 0.000000000 |
| N | 0.560000000 | -16.233000000 | 0.000000000 |
| N | 1.781000000 | -14.118000000 | 0.000000000 |
| B | 0.560000000 | -13.413000000 | 0.000000000 |
| B | 1.781000000 | -11.298000000 | 0.000000000 |
| N | 0.560000000 | -12.003000000 | 0.000000000 |
| N | 1.781000000 | -9.888000000  | 0.000000000 |
| B | 0.560000000 | -9.183000000  | 0.000000000 |
| B | 1.781000000 | -7.068000000  | 0.000000000 |
| N | 0.560000000 | -7.773000000  | 0.000000000 |
| N | 1.781000000 | -5.658000000  | 0.000000000 |
| B | 0.560000000 | -4.953000000  | 0.000000000 |
| B | 1.781000000 | -2.838000000  | 0.000000000 |
| N | 0.560000000 | -3.543000000  | 0.000000000 |
| N | 1.781000000 | -1.428000000  | 0.000000000 |
| N | 1.781000000 | 2.802000000   | 0.000000000 |
| B | 0.560000000 | 3.507000000   | 0.000000000 |
| B | 1.781000000 | 5.622000000   | 0.000000000 |
| N | 0.560000000 | 4.917000000   | 0.000000000 |
| N | 1.781000000 | 7.032000000   | 0.000000000 |
| B | 0.560000000 | 7.737000000   | 0.000000000 |
| B | 1.781000000 | 9.852000000   | 0.000000000 |
| N | 0.560000000 | 9.147000000   | 0.000000000 |
| N | 1.781000000 | 11.262000000  | 0.000000000 |
| B | 0.560000000 | 11.967000000  | 0.000000000 |
| B | 1.781000000 | 14.082000000  | 0.000000000 |
| N | 0.560000000 | 13.377000000  | 0.000000000 |
| N | 1.781000000 | 15.492000000  | 0.000000000 |
| B | 0.560000000 | 16.197000000  | 0.000000000 |
| B | 4.224000000 | -15.528000000 | 0.000000000 |
| N | 3.003000000 | -16.233000000 | 0.000000000 |
| N | 4.224000000 | -14.118000000 | 0.000000000 |
| B | 3.003000000 | -13.413000000 | 0.000000000 |
| B | 4.224000000 | -11.298000000 | 0.000000000 |
| N | 3.003000000 | -12.003000000 | 0.000000000 |
| N | 4.224000000 | -9.888000000  | 0.000000000 |
| B | 3.003000000 | -9.183000000  | 0.000000000 |
| B | 4.224000000 | -7.068000000  | 0.000000000 |
| N | 3.003000000 | -7.773000000  | 0.000000000 |
| N | 4.224000000 | -5.658000000  | 0.000000000 |
| B | 3.003000000 | -4.953000000  | 0.000000000 |
| B | 4.224000000 | -2.838000000  | 0.000000000 |
| N | 3.003000000 | -3.543000000  | 0.000000000 |
| N | 4.224000000 | -1.428000000  | 0.000000000 |
| B | 3.003000000 | -0.723000000  | 0.000000000 |
| B | 4.224000000 | 1.392000000   | 0.000000000 |
| N | 3.003000000 | 0.687000000   | 0.000000000 |
| N | 4.224000000 | 2.802000000   | 0.000000000 |
| B | 3.003000000 | 3.507000000   | 0.000000000 |
| B | 4.224000000 | 5.622000000   | 0.000000000 |
| N | 3.003000000 | 4.917000000   | 0.000000000 |
| N | 4.224000000 | 7.032000000   | 0.000000000 |
| B | 3.003000000 | 7.737000000   | 0.000000000 |
| B | 4.224000000 | 9.852000000   | 0.000000000 |
| N | 3.003000000 | 9.147000000   | 0.000000000 |
| N | 4.224000000 | 11.262000000  | 0.000000000 |
| B | 3.003000000 | 11.967000000  | 0.000000000 |
| B | 4.224000000 | 14.082000000  | 0.000000000 |
| N | 3.003000000 | 13.377000000  | 0.000000000 |
| N | 4.224000000 | 15.492000000  | 0.000000000 |
| B | 3.003000000 | 16.197000000  | 0.000000000 |
| B | 6.666000000 | -15.528000000 | 0.000000000 |
| N | 5.445000000 | -16.233000000 | 0.000000000 |
| N | 6.666000000 | -14.118000000 | 0.000000000 |
| B | 5.445000000 | -13.413000000 | 0.000000000 |
| B | 6.666000000 | -11.298000000 | 0.000000000 |
| N | 5.445000000 | -12.003000000 | 0.000000000 |
| N | 6.666000000 | -9.888000000  | 0.000000000 |
| B | 5.445000000 | -9.183000000  | 0.000000000 |
| B | 6.666000000 | -7.068000000  | 0.000000000 |
| N | 5.445000000 | -7.773000000  | 0.000000000 |
| N | 6.666000000 | -5.658000000  | 0.000000000 |
| B | 5.445000000 | -4.953000000  | 0.000000000 |
| B | 6.666000000 | -2.838000000  | 0.000000000 |
| N | 5.445000000 | -3.543000000  | 0.000000000 |

|   |              |               |             |
|---|--------------|---------------|-------------|
| N | 6.666000000  | -1.428000000  | 0.000000000 |
| B | 5.445000000  | -0.723000000  | 0.000000000 |
| B | 6.666000000  | 1.392000000   | 0.000000000 |
| N | 5.445000000  | 0.687000000   | 0.000000000 |
| N | 6.666000000  | 2.802000000   | 0.000000000 |
| B | 5.445000000  | 3.507000000   | 0.000000000 |
| B | 6.666000000  | 5.622000000   | 0.000000000 |
| N | 5.445000000  | 4.917000000   | 0.000000000 |
| N | 6.666000000  | 7.032000000   | 0.000000000 |
| B | 5.445000000  | 7.737000000   | 0.000000000 |
| B | 6.666000000  | 9.852000000   | 0.000000000 |
| N | 5.445000000  | 9.147000000   | 0.000000000 |
| N | 6.666000000  | 11.262000000  | 0.000000000 |
| B | 5.445000000  | 11.967000000  | 0.000000000 |
| B | 6.666000000  | 14.082000000  | 0.000000000 |
| N | 5.445000000  | 13.377000000  | 0.000000000 |
| N | 6.666000000  | 15.492000000  | 0.000000000 |
| B | 5.445000000  | 16.197000000  | 0.000000000 |
| B | 9.108000000  | -15.528000000 | 0.000000000 |
| N | 7.887000000  | -16.233000000 | 0.000000000 |
| N | 9.108000000  | -14.118000000 | 0.000000000 |
| B | 7.887000000  | -13.413000000 | 0.000000000 |
| B | 9.108000000  | -11.298000000 | 0.000000000 |
| N | 7.887000000  | -12.003000000 | 0.000000000 |
| N | 9.108000000  | -9.888000000  | 0.000000000 |
| B | 7.887000000  | -9.183000000  | 0.000000000 |
| B | 9.108000000  | -7.068000000  | 0.000000000 |
| N | 7.887000000  | -7.773000000  | 0.000000000 |
| N | 9.108000000  | -5.658000000  | 0.000000000 |
| B | 7.887000000  | -4.953000000  | 0.000000000 |
| B | 9.108000000  | -2.838000000  | 0.000000000 |
| N | 7.887000000  | -3.543000000  | 0.000000000 |
| N | 9.108000000  | -1.428000000  | 0.000000000 |
| B | 7.887000000  | -0.723000000  | 0.000000000 |
| B | 9.108000000  | 1.392000000   | 0.000000000 |
| N | 7.887000000  | 0.687000000   | 0.000000000 |
| N | 9.108000000  | 2.802000000   | 0.000000000 |
| B | 7.887000000  | 3.507000000   | 0.000000000 |
| B | 9.108000000  | 5.622000000   | 0.000000000 |
| N | 7.887000000  | 4.917000000   | 0.000000000 |
| N | 9.108000000  | 7.032000000   | 0.000000000 |
| B | 7.887000000  | 7.737000000   | 0.000000000 |
| B | 9.108000000  | 9.852000000   | 0.000000000 |
| N | 7.887000000  | 9.147000000   | 0.000000000 |
| N | 9.108000000  | 11.262000000  | 0.000000000 |
| B | 7.887000000  | 11.967000000  | 0.000000000 |
| B | 9.108000000  | 14.082000000  | 0.000000000 |
| N | 7.887000000  | 13.377000000  | 0.000000000 |
| N | 9.108000000  | 15.492000000  | 0.000000000 |
| B | 7.887000000  | 16.197000000  | 0.000000000 |
| B | 11.550000000 | -15.528000000 | 0.000000000 |
| N | 10.329000000 | -16.233000000 | 0.000000000 |
| N | 11.550000000 | -14.118000000 | 0.000000000 |
| B | 10.329000000 | -13.413000000 | 0.000000000 |
| B | 11.550000000 | -11.298000000 | 0.000000000 |
| N | 10.329000000 | -12.003000000 | 0.000000000 |
| N | 11.550000000 | -9.888000000  | 0.000000000 |
| B | 10.329000000 | -9.183000000  | 0.000000000 |
| B | 11.550000000 | -7.068000000  | 0.000000000 |
| N | 10.329000000 | -7.773000000  | 0.000000000 |
| N | 11.550000000 | -5.658000000  | 0.000000000 |
| B | 10.329000000 | -4.953000000  | 0.000000000 |
| B | 11.550000000 | -2.838000000  | 0.000000000 |
| N | 10.329000000 | -3.543000000  | 0.000000000 |
| N | 11.550000000 | -1.428000000  | 0.000000000 |
| B | 10.329000000 | -0.723000000  | 0.000000000 |
| B | 11.550000000 | 1.392000000   | 0.000000000 |
| N | 10.329000000 | 0.687000000   | 0.000000000 |
| N | 11.550000000 | 2.802000000   | 0.000000000 |
| B | 10.329000000 | 3.507000000   | 0.000000000 |
| B | 11.550000000 | 5.622000000   | 0.000000000 |
| N | 10.329000000 | 4.917000000   | 0.000000000 |
| N | 11.550000000 | 7.032000000   | 0.000000000 |
| B | 10.329000000 | 7.737000000   | 0.000000000 |
| B | 11.550000000 | 9.852000000   | 0.000000000 |

|   |               |                |              |
|---|---------------|----------------|--------------|
| N | 10.3290000000 | 9.1470000000   | 0.0000000000 |
| N | 11.5500000000 | 11.2620000000  | 0.0000000000 |
| B | 10.3290000000 | 11.9670000000  | 0.0000000000 |
| B | 11.5500000000 | 14.0820000000  | 0.0000000000 |
| N | 10.3290000000 | 13.3770000000  | 0.0000000000 |
| N | 11.5500000000 | 15.4920000000  | 0.0000000000 |
| B | 10.3290000000 | 16.1970000000  | 0.0000000000 |
| B | 13.9920000000 | -15.5280000000 | 0.0000000000 |
| N | 12.7710000000 | -16.2330000000 | 0.0000000000 |
| N | 13.9920000000 | -14.1180000000 | 0.0000000000 |
| B | 12.7710000000 | -13.4130000000 | 0.0000000000 |
| B | 13.9920000000 | -11.2980000000 | 0.0000000000 |
| N | 12.7710000000 | -12.0030000000 | 0.0000000000 |
| N | 13.9920000000 | -9.8880000000  | 0.0000000000 |
| B | 12.7710000000 | -9.1830000000  | 0.0000000000 |
| B | 13.9920000000 | -7.0680000000  | 0.0000000000 |
| N | 12.7710000000 | -7.7730000000  | 0.0000000000 |
| N | 13.9920000000 | -5.6580000000  | 0.0000000000 |
| B | 12.7710000000 | -4.9530000000  | 0.0000000000 |
| B | 13.9920000000 | -2.8380000000  | 0.0000000000 |
| N | 12.7710000000 | -3.5430000000  | 0.0000000000 |
| N | 13.9920000000 | -1.4280000000  | 0.0000000000 |
| B | 12.7710000000 | -0.7230000000  | 0.0000000000 |
| B | 13.9920000000 | 1.3920000000   | 0.0000000000 |
| N | 12.7710000000 | 0.6870000000   | 0.0000000000 |
| N | 13.9920000000 | 2.8020000000   | 0.0000000000 |
| B | 12.7710000000 | 3.5070000000   | 0.0000000000 |
| B | 13.9920000000 | 5.6220000000   | 0.0000000000 |
| N | 12.7710000000 | 4.9170000000   | 0.0000000000 |
| N | 13.9920000000 | 7.0320000000   | 0.0000000000 |
| B | 12.7710000000 | 7.7370000000   | 0.0000000000 |
| B | 13.9920000000 | 9.8520000000   | 0.0000000000 |
| N | 12.7710000000 | 9.1470000000   | 0.0000000000 |
| N | 13.9920000000 | 11.2620000000  | 0.0000000000 |
| B | 12.7710000000 | 11.9670000000  | 0.0000000000 |
| B | 13.9920000000 | 14.0820000000  | 0.0000000000 |
| N | 12.7710000000 | 13.3770000000  | 0.0000000000 |
| N | 13.9920000000 | 15.4920000000  | 0.0000000000 |
| B | 12.7710000000 | 16.1970000000  | 0.0000000000 |
| B | 16.4350000000 | -15.5280000000 | 0.0000000000 |
| N | 15.2130000000 | -16.2330000000 | 0.0000000000 |
| N | 16.4350000000 | -14.1180000000 | 0.0000000000 |
| B | 15.2130000000 | -13.4130000000 | 0.0000000000 |
| B | 16.4350000000 | -11.2980000000 | 0.0000000000 |
| N | 15.2130000000 | -12.0030000000 | 0.0000000000 |
| N | 16.4350000000 | -9.8880000000  | 0.0000000000 |
| B | 15.2130000000 | -9.1830000000  | 0.0000000000 |
| B | 16.4350000000 | -7.0680000000  | 0.0000000000 |
| N | 15.2130000000 | -7.7730000000  | 0.0000000000 |
| N | 16.4350000000 | -5.6580000000  | 0.0000000000 |
| B | 15.2130000000 | -4.9530000000  | 0.0000000000 |
| B | 16.4350000000 | -2.8380000000  | 0.0000000000 |
| N | 15.2130000000 | -3.5430000000  | 0.0000000000 |
| N | 16.4350000000 | -1.4280000000  | 0.0000000000 |
| B | 15.2130000000 | -0.7230000000  | 0.0000000000 |
| B | 16.4350000000 | 1.3920000000   | 0.0000000000 |
| N | 15.2130000000 | 0.6870000000   | 0.0000000000 |
| N | 16.4350000000 | 2.8020000000   | 0.0000000000 |
| B | 15.2130000000 | 3.5070000000   | 0.0000000000 |
| B | 16.4350000000 | 5.6220000000   | 0.0000000000 |
| N | 15.2130000000 | 4.9170000000   | 0.0000000000 |
| N | 16.4350000000 | 7.0320000000   | 0.0000000000 |
| B | 15.2130000000 | 7.7370000000   | 0.0000000000 |
| B | 16.4350000000 | 9.8520000000   | 0.0000000000 |
| N | 15.2130000000 | 9.1470000000   | 0.0000000000 |
| N | 16.4350000000 | 11.2620000000  | 0.0000000000 |
| B | 15.2130000000 | 11.9670000000  | 0.0000000000 |
| B | 16.4350000000 | 14.0820000000  | 0.0000000000 |
| N | 15.2130000000 | 13.3770000000  | 0.0000000000 |
| N | 16.4350000000 | 15.4920000000  | 0.0000000000 |
| B | 15.2130000000 | 16.1970000000  | 0.0000000000 |

**Pore 2.** (The final potential energy from DFT calculations: -14101.21 Hartree)



|   |                |                |              |
|---|----------------|----------------|--------------|
| B | -15.2640000000 | -15.5100000000 | 0.0000000000 |
| N | -16.4850000000 | -16.2150000000 | 0.0000000000 |
| N | -15.2640000000 | -14.1000000000 | 0.0000000000 |
| B | -16.4850000000 | -13.3950000000 | 0.0000000000 |
| B | -15.2640000000 | -11.2800000000 | 0.0000000000 |
| N | -16.4850000000 | -11.9850000000 | 0.0000000000 |
| N | -15.2640000000 | -9.8700000000  | 0.0000000000 |
| B | -16.4850000000 | -9.1650000000  | 0.0000000000 |
| B | -15.2640000000 | -7.0500000000  | 0.0000000000 |
| N | -16.4850000000 | -7.7550000000  | 0.0000000000 |
| N | -15.2640000000 | -5.6400000000  | 0.0000000000 |
| B | -16.4850000000 | -4.9350000000  | 0.0000000000 |
| B | -15.2640000000 | -2.8200000000  | 0.0000000000 |
| N | -16.4850000000 | -3.5250000000  | 0.0000000000 |
| N | -15.2640000000 | -1.4100000000  | 0.0000000000 |
| B | -16.4850000000 | -0.7050000000  | 0.0000000000 |
| B | -15.2640000000 | 1.4100000000   | 0.0000000000 |
| N | -16.4850000000 | 0.7050000000   | 0.0000000000 |
| N | -15.2640000000 | 2.8200000000   | 0.0000000000 |
| B | -16.4850000000 | 3.5250000000   | 0.0000000000 |
| B | -15.2640000000 | 5.6400000000   | 0.0000000000 |
| N | -16.4850000000 | 4.9350000000   | 0.0000000000 |
| N | -15.2640000000 | 7.0500000000   | 0.0000000000 |
| B | -16.4850000000 | 7.7550000000   | 0.0000000000 |
| B | -15.2640000000 | 9.8700000000   | 0.0000000000 |
| N | -16.4850000000 | 9.1650000000   | 0.0000000000 |
| N | -15.2640000000 | 11.2800000000  | 0.0000000000 |
| B | -16.4850000000 | 11.9850000000  | 0.0000000000 |
| B | -15.2640000000 | 14.1000000000  | 0.0000000000 |
| N | -16.4850000000 | 13.3950000000  | 0.0000000000 |
| N | -15.2640000000 | 15.5100000000  | 0.0000000000 |
| B | -16.4850000000 | 16.2150000000  | 0.0000000000 |
| B | -12.8220000000 | -15.5100000000 | 0.0000000000 |
| N | -14.0430000000 | -16.2150000000 | 0.0000000000 |
| N | -12.8220000000 | -14.1000000000 | 0.0000000000 |
| B | -14.0430000000 | -13.3950000000 | 0.0000000000 |
| B | -12.8220000000 | -11.2800000000 | 0.0000000000 |
| N | -14.0430000000 | -11.9850000000 | 0.0000000000 |
| N | -12.8220000000 | -9.8700000000  | 0.0000000000 |
| B | -14.0430000000 | -9.1650000000  | 0.0000000000 |
| B | -12.8220000000 | -7.0500000000  | 0.0000000000 |
| N | -14.0430000000 | -7.7550000000  | 0.0000000000 |
| N | -12.8220000000 | -5.6400000000  | 0.0000000000 |
| B | -14.0430000000 | -4.9350000000  | 0.0000000000 |
| B | -12.8220000000 | -2.8200000000  | 0.0000000000 |
| N | -14.0430000000 | -3.5250000000  | 0.0000000000 |
| N | -12.8220000000 | -1.4100000000  | 0.0000000000 |
| B | -14.0430000000 | -0.7050000000  | 0.0000000000 |
| B | -12.8220000000 | 1.4100000000   | 0.0000000000 |
| N | -14.0430000000 | 0.7050000000   | 0.0000000000 |
| N | -12.8220000000 | 2.8200000000   | 0.0000000000 |
| B | -14.0430000000 | 3.5250000000   | 0.0000000000 |
| B | -12.8220000000 | 5.6400000000   | 0.0000000000 |
| N | -14.0430000000 | 4.9350000000   | 0.0000000000 |
| N | -12.8220000000 | 7.0500000000   | 0.0000000000 |
| B | -14.0430000000 | 7.7550000000   | 0.0000000000 |
| B | -12.8220000000 | 9.8700000000   | 0.0000000000 |
| N | -14.0430000000 | 9.1650000000   | 0.0000000000 |
| N | -12.8220000000 | 11.2800000000  | 0.0000000000 |
| B | -14.0430000000 | 11.9850000000  | 0.0000000000 |
| B | -12.8220000000 | 14.1000000000  | 0.0000000000 |
| N | -14.0430000000 | 13.3950000000  | 0.0000000000 |
| N | -12.8220000000 | 15.5100000000  | 0.0000000000 |
| B | -14.0430000000 | 16.2150000000  | 0.0000000000 |
| B | -10.3800000000 | -15.5100000000 | 0.0000000000 |
| N | -11.6010000000 | -16.2150000000 | 0.0000000000 |
| N | -10.3800000000 | -14.1000000000 | 0.0000000000 |
| B | -11.6010000000 | -13.3950000000 | 0.0000000000 |
| B | -10.3800000000 | -11.2800000000 | 0.0000000000 |
| N | -11.6010000000 | -11.9850000000 | 0.0000000000 |
| N | -10.3800000000 | -9.8700000000  | 0.0000000000 |
| B | -11.6010000000 | -9.1650000000  | 0.0000000000 |
| B | -10.3800000000 | -7.0500000000  | 0.0000000000 |
| N | -11.6010000000 | -7.7550000000  | 0.0000000000 |
| N | -10.3800000000 | -5.6400000000  | 0.0000000000 |

|   |               |               |             |
|---|---------------|---------------|-------------|
| B | -11.601000000 | -4.935000000  | 0.000000000 |
| B | -10.380000000 | -2.820000000  | 0.000000000 |
| N | -11.601000000 | -3.525000000  | 0.000000000 |
| N | -10.380000000 | -1.410000000  | 0.000000000 |
| B | -11.601000000 | -0.705000000  | 0.000000000 |
| B | -10.380000000 | 1.410000000   | 0.000000000 |
| N | -11.601000000 | 0.705000000   | 0.000000000 |
| N | -10.380000000 | 2.820000000   | 0.000000000 |
| B | -11.601000000 | 3.525000000   | 0.000000000 |
| B | -10.380000000 | 5.640000000   | 0.000000000 |
| N | -11.601000000 | 4.935000000   | 0.000000000 |
| N | -10.380000000 | 7.050000000   | 0.000000000 |
| B | -11.601000000 | 7.755000000   | 0.000000000 |
| B | -10.380000000 | 9.870000000   | 0.000000000 |
| N | -11.601000000 | 9.165000000   | 0.000000000 |
| N | -10.380000000 | 11.280000000  | 0.000000000 |
| B | -11.601000000 | 11.985000000  | 0.000000000 |
| B | -10.380000000 | 14.100000000  | 0.000000000 |
| N | -11.601000000 | 13.395000000  | 0.000000000 |
| N | -10.380000000 | 15.510000000  | 0.000000000 |
| B | -11.601000000 | 16.215000000  | 0.000000000 |
| B | -7.937000000  | -15.510000000 | 0.000000000 |
| N | -9.158000000  | -16.215000000 | 0.000000000 |
| N | -7.937000000  | -14.100000000 | 0.000000000 |
| B | -9.158000000  | -13.395000000 | 0.000000000 |
| B | -7.937000000  | -11.280000000 | 0.000000000 |
| N | -9.158000000  | -11.985000000 | 0.000000000 |
| N | -7.937000000  | -9.870000000  | 0.000000000 |
| B | -9.158000000  | -9.165000000  | 0.000000000 |
| B | -7.937000000  | -7.050000000  | 0.000000000 |
| N | -9.158000000  | -7.755000000  | 0.000000000 |
| N | -7.937000000  | -5.640000000  | 0.000000000 |
| B | -9.158000000  | -4.935000000  | 0.000000000 |
| B | -7.937000000  | -2.820000000  | 0.000000000 |
| N | -9.158000000  | -3.525000000  | 0.000000000 |
| N | -7.937000000  | -1.410000000  | 0.000000000 |
| B | -9.158000000  | -0.705000000  | 0.000000000 |
| B | -7.937000000  | 1.410000000   | 0.000000000 |
| N | -9.158000000  | 0.705000000   | 0.000000000 |
| N | -7.937000000  | 2.820000000   | 0.000000000 |
| B | -9.158000000  | 3.525000000   | 0.000000000 |
| B | -7.937000000  | 5.640000000   | 0.000000000 |
| N | -9.158000000  | 4.935000000   | 0.000000000 |
| N | -7.937000000  | 7.050000000   | 0.000000000 |
| B | -9.158000000  | 7.755000000   | 0.000000000 |
| B | -7.937000000  | 9.870000000   | 0.000000000 |
| N | -9.158000000  | 9.165000000   | 0.000000000 |
| N | -7.937000000  | 11.280000000  | 0.000000000 |
| B | -9.158000000  | 11.985000000  | 0.000000000 |
| B | -7.937000000  | 14.100000000  | 0.000000000 |
| N | -9.158000000  | 13.395000000  | 0.000000000 |
| N | -7.937000000  | 15.510000000  | 0.000000000 |
| B | -9.158000000  | 16.215000000  | 0.000000000 |
| B | -5.495000000  | -15.510000000 | 0.000000000 |
| N | -6.716000000  | -16.215000000 | 0.000000000 |
| N | -5.495000000  | -14.100000000 | 0.000000000 |
| B | -6.716000000  | -13.395000000 | 0.000000000 |
| B | -5.495000000  | -11.280000000 | 0.000000000 |
| N | -6.716000000  | -11.985000000 | 0.000000000 |
| N | -5.495000000  | -9.870000000  | 0.000000000 |
| B | -6.716000000  | -9.165000000  | 0.000000000 |
| B | -5.495000000  | -7.050000000  | 0.000000000 |
| N | -6.716000000  | -7.755000000  | 0.000000000 |
| N | -5.495000000  | -5.640000000  | 0.000000000 |
| B | -6.716000000  | -4.935000000  | 0.000000000 |
| B | -5.495000000  | -2.820000000  | 0.000000000 |
| N | -6.716000000  | -3.525000000  | 0.000000000 |
| N | -5.495000000  | -1.410000000  | 0.000000000 |
| B | -6.716000000  | -0.705000000  | 0.000000000 |
| B | -5.495000000  | 1.410000000   | 0.000000000 |
| N | -6.716000000  | 0.705000000   | 0.000000000 |
| N | -5.495000000  | 2.820000000   | 0.000000000 |
| B | -6.716000000  | 3.525000000   | 0.000000000 |
| B | -5.495000000  | 5.640000000   | 0.000000000 |
| N | -6.716000000  | 4.935000000   | 0.000000000 |

|   |              |               |             |
|---|--------------|---------------|-------------|
| N | -5.495000000 | 7.050000000   | 0.000000000 |
| B | -6.716000000 | 7.755000000   | 0.000000000 |
| B | -5.495000000 | 9.870000000   | 0.000000000 |
| N | -6.716000000 | 9.165000000   | 0.000000000 |
| N | -5.495000000 | 11.280000000  | 0.000000000 |
| B | -6.716000000 | 11.985000000  | 0.000000000 |
| B | -5.495000000 | 14.100000000  | 0.000000000 |
| N | -6.716000000 | 13.395000000  | 0.000000000 |
| N | -5.495000000 | 15.510000000  | 0.000000000 |
| B | -6.716000000 | 16.215000000  | 0.000000000 |
| B | -3.053000000 | -15.510000000 | 0.000000000 |
| N | -4.274000000 | -16.215000000 | 0.000000000 |
| N | -3.053000000 | -14.100000000 | 0.000000000 |
| B | -4.274000000 | -13.395000000 | 0.000000000 |
| B | -3.053000000 | -11.280000000 | 0.000000000 |
| N | -4.274000000 | -11.985000000 | 0.000000000 |
| N | -3.053000000 | -9.870000000  | 0.000000000 |
| B | -4.274000000 | -9.165000000  | 0.000000000 |
| B | -3.053000000 | -7.050000000  | 0.000000000 |
| N | -4.274000000 | -7.755000000  | 0.000000000 |
| N | -3.053000000 | -5.640000000  | 0.000000000 |
| B | -4.274000000 | -4.935000000  | 0.000000000 |
| N | -4.274000000 | -3.525000000  | 0.000000000 |
| N | -3.053000000 | 2.820000000   | 0.000000000 |
| B | -4.274000000 | 3.525000000   | 0.000000000 |
| B | -3.053000000 | 5.640000000   | 0.000000000 |
| N | -4.274000000 | 4.935000000   | 0.000000000 |
| N | -3.053000000 | 7.050000000   | 0.000000000 |
| B | -4.274000000 | 7.755000000   | 0.000000000 |
| B | -3.053000000 | 9.870000000   | 0.000000000 |
| N | -4.274000000 | 9.165000000   | 0.000000000 |
| N | -3.053000000 | 11.280000000  | 0.000000000 |
| B | -4.274000000 | 11.985000000  | 0.000000000 |
| B | -3.053000000 | 14.100000000  | 0.000000000 |
| N | -4.274000000 | 13.395000000  | 0.000000000 |
| N | -3.053000000 | 15.510000000  | 0.000000000 |
| B | -4.274000000 | 16.215000000  | 0.000000000 |
| B | -0.611000000 | -15.510000000 | 0.000000000 |
| N | -1.832000000 | -16.215000000 | 0.000000000 |
| N | -0.611000000 | -14.100000000 | 0.000000000 |
| B | -1.832000000 | -13.395000000 | 0.000000000 |
| B | -0.611000000 | -11.280000000 | 0.000000000 |
| N | -1.832000000 | -11.985000000 | 0.000000000 |
| N | -0.611000000 | -9.870000000  | 0.000000000 |
| B | -1.832000000 | -9.165000000  | 0.000000000 |
| B | -0.611000000 | -7.050000000  | 0.000000000 |
| N | -1.832000000 | -7.755000000  | 0.000000000 |
| N | -0.611000000 | -5.640000000  | 0.000000000 |
| B | -1.832000000 | -4.935000000  | 0.000000000 |
| N | -0.611000000 | 2.820000000   | 0.000000000 |
| B | -1.832000000 | 3.525000000   | 0.000000000 |
| B | -0.611000000 | 5.640000000   | 0.000000000 |
| N | -1.832000000 | 4.935000000   | 0.000000000 |
| N | -0.611000000 | 7.050000000   | 0.000000000 |
| B | -1.832000000 | 7.755000000   | 0.000000000 |
| B | -0.611000000 | 9.870000000   | 0.000000000 |
| N | -1.832000000 | 9.165000000   | 0.000000000 |
| N | -0.611000000 | 11.280000000  | 0.000000000 |
| B | -1.832000000 | 11.985000000  | 0.000000000 |
| B | -0.611000000 | 14.100000000  | 0.000000000 |
| N | -1.832000000 | 13.395000000  | 0.000000000 |
| N | -0.611000000 | 15.510000000  | 0.000000000 |
| B | -1.832000000 | 16.215000000  | 0.000000000 |
| B | 1.831000000  | -15.510000000 | 0.000000000 |
| N | 0.610000000  | -16.215000000 | 0.000000000 |
| N | 1.831000000  | -14.100000000 | 0.000000000 |
| B | 0.610000000  | -13.395000000 | 0.000000000 |
| B | 1.831000000  | -11.280000000 | 0.000000000 |
| N | 0.610000000  | -11.985000000 | 0.000000000 |
| N | 1.831000000  | -9.870000000  | 0.000000000 |
| B | 0.610000000  | -9.165000000  | 0.000000000 |
| B | 1.831000000  | -7.050000000  | 0.000000000 |
| N | 0.610000000  | -7.755000000  | 0.000000000 |
| N | 1.831000000  | -5.640000000  | 0.000000000 |
| B | 0.610000000  | -4.935000000  | 0.000000000 |

|   |              |                |              |
|---|--------------|----------------|--------------|
| N | 1.8310000000 | 2.8200000000   | 0.0000000000 |
| B | 0.6100000000 | 3.5250000000   | 0.0000000000 |
| B | 1.8310000000 | 5.6400000000   | 0.0000000000 |
| N | 0.6100000000 | 4.9350000000   | 0.0000000000 |
| N | 1.8310000000 | 7.0500000000   | 0.0000000000 |
| B | 0.6100000000 | 7.7550000000   | 0.0000000000 |
| B | 1.8310000000 | 9.8700000000   | 0.0000000000 |
| N | 0.6100000000 | 9.1650000000   | 0.0000000000 |
| N | 1.8310000000 | 11.2800000000  | 0.0000000000 |
| B | 0.6100000000 | 11.9850000000  | 0.0000000000 |
| B | 1.8310000000 | 14.1000000000  | 0.0000000000 |
| N | 0.6100000000 | 13.3950000000  | 0.0000000000 |
| N | 1.8310000000 | 15.5100000000  | 0.0000000000 |
| B | 0.6100000000 | 16.2150000000  | 0.0000000000 |
| B | 4.2740000000 | -15.5100000000 | 0.0000000000 |
| N | 3.0530000000 | -16.2150000000 | 0.0000000000 |
| N | 4.2740000000 | -14.1000000000 | 0.0000000000 |
| B | 3.0530000000 | -13.3950000000 | 0.0000000000 |
| B | 4.2740000000 | -11.2800000000 | 0.0000000000 |
| N | 3.0530000000 | -11.9850000000 | 0.0000000000 |
| N | 4.2740000000 | -9.8700000000  | 0.0000000000 |
| B | 3.0530000000 | -9.1650000000  | 0.0000000000 |
| B | 4.2740000000 | -7.0500000000  | 0.0000000000 |
| N | 3.0530000000 | -7.7550000000  | 0.0000000000 |
| N | 4.2740000000 | -5.6400000000  | 0.0000000000 |
| B | 3.0530000000 | -4.9350000000  | 0.0000000000 |
| B | 4.2740000000 | -2.8200000000  | 0.0000000000 |
| N | 3.0530000000 | -3.5250000000  | 0.0000000000 |
| N | 4.2740000000 | -1.4100000000  | 0.0000000000 |
| B | 4.2740000000 | 1.4100000000   | 0.0000000000 |
| N | 4.2740000000 | 2.8200000000   | 0.0000000000 |
| B | 3.0530000000 | 3.5250000000   | 0.0000000000 |
| B | 4.2740000000 | 5.6400000000   | 0.0000000000 |
| N | 3.0530000000 | 4.9350000000   | 0.0000000000 |
| N | 4.2740000000 | 7.0500000000   | 0.0000000000 |
| B | 3.0530000000 | 7.7550000000   | 0.0000000000 |
| B | 4.2740000000 | 9.8700000000   | 0.0000000000 |
| N | 3.0530000000 | 9.1650000000   | 0.0000000000 |
| N | 4.2740000000 | 11.2800000000  | 0.0000000000 |
| B | 3.0530000000 | 11.9850000000  | 0.0000000000 |
| B | 4.2740000000 | 14.1000000000  | 0.0000000000 |
| N | 3.0530000000 | 13.3950000000  | 0.0000000000 |
| N | 4.2740000000 | 15.5100000000  | 0.0000000000 |
| B | 3.0530000000 | 16.2150000000  | 0.0000000000 |
| B | 6.7160000000 | -15.5100000000 | 0.0000000000 |
| N | 5.4950000000 | -16.2150000000 | 0.0000000000 |
| N | 6.7160000000 | -14.1000000000 | 0.0000000000 |
| B | 5.4950000000 | -13.3950000000 | 0.0000000000 |
| B | 6.7160000000 | -11.2800000000 | 0.0000000000 |
| N | 5.4950000000 | -11.9850000000 | 0.0000000000 |
| N | 6.7160000000 | -9.8700000000  | 0.0000000000 |
| B | 5.4950000000 | -9.1650000000  | 0.0000000000 |
| B | 6.7160000000 | -7.0500000000  | 0.0000000000 |
| N | 5.4950000000 | -7.7550000000  | 0.0000000000 |
| N | 6.7160000000 | -5.6400000000  | 0.0000000000 |
| B | 5.4950000000 | -4.9350000000  | 0.0000000000 |
| B | 6.7160000000 | -2.8200000000  | 0.0000000000 |
| N | 5.4950000000 | -3.5250000000  | 0.0000000000 |
| N | 6.7160000000 | -1.4100000000  | 0.0000000000 |
| B | 5.4950000000 | -0.7050000000  | 0.0000000000 |
| B | 6.7160000000 | 1.4100000000   | 0.0000000000 |
| N | 5.4950000000 | 0.7050000000   | 0.0000000000 |
| N | 6.7160000000 | 2.8200000000   | 0.0000000000 |
| B | 5.4950000000 | 3.5250000000   | 0.0000000000 |
| B | 6.7160000000 | 5.6400000000   | 0.0000000000 |
| N | 5.4950000000 | 4.9350000000   | 0.0000000000 |
| N | 6.7160000000 | 7.0500000000   | 0.0000000000 |
| B | 5.4950000000 | 7.7550000000   | 0.0000000000 |
| B | 6.7160000000 | 9.8700000000   | 0.0000000000 |
| N | 5.4950000000 | 9.1650000000   | 0.0000000000 |
| N | 6.7160000000 | 11.2800000000  | 0.0000000000 |
| B | 5.4950000000 | 11.9850000000  | 0.0000000000 |
| B | 6.7160000000 | 14.1000000000  | 0.0000000000 |
| N | 5.4950000000 | 13.3950000000  | 0.0000000000 |
| N | 6.7160000000 | 15.5100000000  | 0.0000000000 |

|   |              |               |             |
|---|--------------|---------------|-------------|
| B | 5.495000000  | 16.215000000  | 0.000000000 |
| B | 9.158000000  | -15.510000000 | 0.000000000 |
| N | 7.937000000  | -16.215000000 | 0.000000000 |
| N | 9.158000000  | -14.100000000 | 0.000000000 |
| B | 7.937000000  | -13.395000000 | 0.000000000 |
| B | 9.158000000  | -11.280000000 | 0.000000000 |
| N | 7.937000000  | -11.985000000 | 0.000000000 |
| N | 9.158000000  | -9.870000000  | 0.000000000 |
| B | 7.937000000  | -9.165000000  | 0.000000000 |
| B | 9.158000000  | -7.050000000  | 0.000000000 |
| N | 7.937000000  | -7.755000000  | 0.000000000 |
| N | 9.158000000  | -5.640000000  | 0.000000000 |
| B | 7.937000000  | -4.935000000  | 0.000000000 |
| B | 9.158000000  | -2.820000000  | 0.000000000 |
| N | 7.937000000  | -3.525000000  | 0.000000000 |
| N | 9.158000000  | -1.410000000  | 0.000000000 |
| B | 7.937000000  | -0.705000000  | 0.000000000 |
| B | 9.158000000  | 1.410000000   | 0.000000000 |
| N | 7.937000000  | 0.705000000   | 0.000000000 |
| N | 9.158000000  | 2.820000000   | 0.000000000 |
| B | 7.937000000  | 3.525000000   | 0.000000000 |
| B | 9.158000000  | 5.640000000   | 0.000000000 |
| N | 7.937000000  | 4.935000000   | 0.000000000 |
| N | 9.158000000  | 7.050000000   | 0.000000000 |
| B | 7.937000000  | 7.755000000   | 0.000000000 |
| B | 9.158000000  | 9.870000000   | 0.000000000 |
| N | 7.937000000  | 9.165000000   | 0.000000000 |
| N | 9.158000000  | 11.280000000  | 0.000000000 |
| B | 7.937000000  | 11.985000000  | 0.000000000 |
| B | 9.158000000  | 14.100000000  | 0.000000000 |
| N | 7.937000000  | 13.395000000  | 0.000000000 |
| N | 9.158000000  | 15.510000000  | 0.000000000 |
| B | 7.937000000  | 16.215000000  | 0.000000000 |
| B | 11.600000000 | -15.510000000 | 0.000000000 |
| N | 10.379000000 | -16.215000000 | 0.000000000 |
| N | 11.600000000 | -14.100000000 | 0.000000000 |
| B | 10.379000000 | -13.395000000 | 0.000000000 |
| B | 11.600000000 | -11.280000000 | 0.000000000 |
| N | 10.379000000 | -11.985000000 | 0.000000000 |
| N | 11.600000000 | -9.870000000  | 0.000000000 |
| B | 10.379000000 | -9.165000000  | 0.000000000 |
| B | 11.600000000 | -7.050000000  | 0.000000000 |
| N | 10.379000000 | -7.755000000  | 0.000000000 |
| N | 11.600000000 | -5.640000000  | 0.000000000 |
| B | 10.379000000 | -4.935000000  | 0.000000000 |
| B | 11.600000000 | -2.820000000  | 0.000000000 |
| N | 10.379000000 | -3.525000000  | 0.000000000 |
| N | 11.600000000 | -1.410000000  | 0.000000000 |
| B | 10.379000000 | -0.705000000  | 0.000000000 |
| B | 11.600000000 | 1.410000000   | 0.000000000 |
| N | 10.379000000 | 0.705000000   | 0.000000000 |
| N | 11.600000000 | 2.820000000   | 0.000000000 |
| B | 10.379000000 | 3.525000000   | 0.000000000 |
| B | 11.600000000 | 5.640000000   | 0.000000000 |
| N | 10.379000000 | 4.935000000   | 0.000000000 |
| N | 11.600000000 | 7.050000000   | 0.000000000 |
| B | 10.379000000 | 7.755000000   | 0.000000000 |
| B | 11.600000000 | 9.870000000   | 0.000000000 |
| N | 10.379000000 | 9.165000000   | 0.000000000 |
| N | 11.600000000 | 11.280000000  | 0.000000000 |
| B | 10.379000000 | 11.985000000  | 0.000000000 |
| B | 11.600000000 | 14.100000000  | 0.000000000 |
| N | 10.379000000 | 13.395000000  | 0.000000000 |
| N | 11.600000000 | 15.510000000  | 0.000000000 |
| B | 10.379000000 | 16.215000000  | 0.000000000 |
| B | 14.042000000 | -15.510000000 | 0.000000000 |
| N | 12.821000000 | -16.215000000 | 0.000000000 |
| N | 14.042000000 | -14.100000000 | 0.000000000 |
| B | 12.821000000 | -13.395000000 | 0.000000000 |
| B | 14.042000000 | -11.280000000 | 0.000000000 |
| N | 12.821000000 | -11.985000000 | 0.000000000 |
| N | 14.042000000 | -9.870000000  | 0.000000000 |
| B | 12.821000000 | -9.165000000  | 0.000000000 |
| B | 14.042000000 | -7.050000000  | 0.000000000 |
| N | 12.821000000 | -7.755000000  | 0.000000000 |

|   |              |               |             |
|---|--------------|---------------|-------------|
| N | 14.042000000 | -5.640000000  | 0.000000000 |
| B | 12.821000000 | -4.935000000  | 0.000000000 |
| B | 14.042000000 | -2.820000000  | 0.000000000 |
| N | 12.821000000 | -3.525000000  | 0.000000000 |
| N | 14.042000000 | -1.410000000  | 0.000000000 |
| B | 12.821000000 | -0.705000000  | 0.000000000 |
| B | 14.042000000 | 1.410000000   | 0.000000000 |
| N | 12.821000000 | 0.705000000   | 0.000000000 |
| N | 14.042000000 | 2.820000000   | 0.000000000 |
| B | 12.821000000 | 3.525000000   | 0.000000000 |
| B | 14.042000000 | 5.640000000   | 0.000000000 |
| N | 12.821000000 | 4.935000000   | 0.000000000 |
| N | 14.042000000 | 7.050000000   | 0.000000000 |
| B | 12.821000000 | 7.755000000   | 0.000000000 |
| B | 14.042000000 | 9.870000000   | 0.000000000 |
| N | 12.821000000 | 9.165000000   | 0.000000000 |
| N | 14.042000000 | 11.280000000  | 0.000000000 |
| B | 12.821000000 | 11.985000000  | 0.000000000 |
| B | 14.042000000 | 14.100000000  | 0.000000000 |
| N | 12.821000000 | 13.395000000  | 0.000000000 |
| N | 14.042000000 | 15.510000000  | 0.000000000 |
| B | 12.821000000 | 16.215000000  | 0.000000000 |
| B | 16.485000000 | -15.510000000 | 0.000000000 |
| N | 15.263000000 | -16.215000000 | 0.000000000 |
| N | 16.485000000 | -14.100000000 | 0.000000000 |
| B | 15.263000000 | -13.395000000 | 0.000000000 |
| B | 16.485000000 | -11.280000000 | 0.000000000 |
| N | 15.263000000 | -11.985000000 | 0.000000000 |
| N | 16.485000000 | -9.870000000  | 0.000000000 |
| B | 15.263000000 | -9.165000000  | 0.000000000 |
| B | 16.485000000 | -7.050000000  | 0.000000000 |
| N | 15.263000000 | -7.755000000  | 0.000000000 |
| N | 16.485000000 | -5.640000000  | 0.000000000 |
| B | 15.263000000 | -4.935000000  | 0.000000000 |
| B | 16.485000000 | -2.820000000  | 0.000000000 |
| N | 15.263000000 | -3.525000000  | 0.000000000 |
| N | 16.485000000 | -1.410000000  | 0.000000000 |
| B | 15.263000000 | -0.705000000  | 0.000000000 |
| B | 16.485000000 | 1.410000000   | 0.000000000 |
| N | 15.263000000 | 0.705000000   | 0.000000000 |
| N | 16.485000000 | 2.820000000   | 0.000000000 |
| B | 15.263000000 | 3.525000000   | 0.000000000 |
| B | 16.485000000 | 5.640000000   | 0.000000000 |
| N | 15.263000000 | 4.935000000   | 0.000000000 |
| N | 16.485000000 | 7.050000000   | 0.000000000 |
| B | 15.263000000 | 7.755000000   | 0.000000000 |
| B | 16.485000000 | 9.870000000   | 0.000000000 |
| N | 15.263000000 | 9.165000000   | 0.000000000 |
| N | 16.485000000 | 11.280000000  | 0.000000000 |
| B | 15.263000000 | 11.985000000  | 0.000000000 |
| B | 16.485000000 | 14.100000000  | 0.000000000 |
| N | 15.263000000 | 13.395000000  | 0.000000000 |
| N | 16.485000000 | 15.510000000  | 0.000000000 |
| B | 15.263000000 | 16.215000000  | 0.000000000 |

### Pore 3. (The final potential energy from DFT calculations: -14911.04 Hartree)

|   |               |               |             |
|---|---------------|---------------|-------------|
| B | -15.275000000 | -15.526000000 | 0.000000000 |
| N | -16.496000000 | -16.231000000 | 0.000000000 |
| N | -15.275000000 | -14.116000000 | 0.000000000 |
| B | -16.496000000 | -13.411000000 | 0.000000000 |
| B | -15.275000000 | -11.296000000 | 0.000000000 |
| N | -16.496000000 | -12.001000000 | 0.000000000 |
| N | -15.275000000 | -9.886000000  | 0.000000000 |
| B | -16.496000000 | -9.181000000  | 0.000000000 |
| B | -15.275000000 | -7.066000000  | 0.000000000 |
| N | -16.496000000 | -7.771000000  | 0.000000000 |
| N | -15.275000000 | -5.656000000  | 0.000000000 |
| B | -16.496000000 | -4.951000000  | 0.000000000 |
| B | -15.275000000 | -2.836000000  | 0.000000000 |
| N | -16.496000000 | -3.541000000  | 0.000000000 |

|   |                |                |              |
|---|----------------|----------------|--------------|
| N | -15.2750000000 | -1.4260000000  | 0.0000000000 |
| B | -16.4960000000 | -0.7210000000  | 0.0000000000 |
| B | -15.2750000000 | 1.3940000000   | 0.0000000000 |
| N | -16.4960000000 | 0.6890000000   | 0.0000000000 |
| N | -15.2750000000 | 2.8040000000   | 0.0000000000 |
| B | -16.4960000000 | 3.5090000000   | 0.0000000000 |
| B | -15.2750000000 | 5.6240000000   | 0.0000000000 |
| N | -16.4960000000 | 4.9190000000   | 0.0000000000 |
| N | -15.2750000000 | 7.0340000000   | 0.0000000000 |
| B | -16.4960000000 | 7.7390000000   | 0.0000000000 |
| B | -15.2750000000 | 9.8540000000   | 0.0000000000 |
| N | -16.4960000000 | 9.1490000000   | 0.0000000000 |
| N | -15.2750000000 | 11.2640000000  | 0.0000000000 |
| B | -16.4960000000 | 11.9690000000  | 0.0000000000 |
| B | -15.2750000000 | 14.0840000000  | 0.0000000000 |
| N | -16.4960000000 | 13.3790000000  | 0.0000000000 |
| N | -15.2750000000 | 15.4940000000  | 0.0000000000 |
| B | -16.4960000000 | 16.1990000000  | 0.0000000000 |
| B | -12.8330000000 | -15.5260000000 | 0.0000000000 |
| N | -14.0540000000 | -16.2310000000 | 0.0000000000 |
| N | -12.8330000000 | -14.1160000000 | 0.0000000000 |
| B | -14.0540000000 | -13.4110000000 | 0.0000000000 |
| B | -12.8330000000 | -11.2960000000 | 0.0000000000 |
| N | -14.0540000000 | -12.0010000000 | 0.0000000000 |
| N | -12.8330000000 | -9.8860000000  | 0.0000000000 |
| B | -14.0540000000 | -9.1810000000  | 0.0000000000 |
| B | -12.8330000000 | -7.0660000000  | 0.0000000000 |
| N | -14.0540000000 | -7.7710000000  | 0.0000000000 |
| N | -12.8330000000 | -5.6560000000  | 0.0000000000 |
| B | -14.0540000000 | -4.9510000000  | 0.0000000000 |
| B | -12.8330000000 | -2.8360000000  | 0.0000000000 |
| N | -14.0540000000 | -3.5410000000  | 0.0000000000 |
| N | -12.8330000000 | -1.4260000000  | 0.0000000000 |
| B | -14.0540000000 | -0.7210000000  | 0.0000000000 |
| B | -12.8330000000 | 1.3940000000   | 0.0000000000 |
| N | -14.0540000000 | 0.6890000000   | 0.0000000000 |
| N | -12.8330000000 | 2.8040000000   | 0.0000000000 |
| B | -14.0540000000 | 3.5090000000   | 0.0000000000 |
| B | -12.8330000000 | 5.6240000000   | 0.0000000000 |
| N | -14.0540000000 | 4.9190000000   | 0.0000000000 |
| N | -12.8330000000 | 7.0340000000   | 0.0000000000 |
| B | -14.0540000000 | 7.7390000000   | 0.0000000000 |
| B | -12.8330000000 | 9.8540000000   | 0.0000000000 |
| N | -14.0540000000 | 9.1490000000   | 0.0000000000 |
| N | -12.8330000000 | 11.2640000000  | 0.0000000000 |
| B | -14.0540000000 | 11.9690000000  | 0.0000000000 |
| B | -12.8330000000 | 14.0840000000  | 0.0000000000 |
| N | -14.0540000000 | 13.3790000000  | 0.0000000000 |
| N | -12.8330000000 | 15.4940000000  | 0.0000000000 |
| B | -14.0540000000 | 16.1990000000  | 0.0000000000 |
| B | -10.3910000000 | -15.5260000000 | 0.0000000000 |
| N | -11.6120000000 | -16.2310000000 | 0.0000000000 |
| N | -10.3910000000 | -14.1160000000 | 0.0000000000 |
| B | -11.6120000000 | -13.4110000000 | 0.0000000000 |
| B | -10.3910000000 | -11.2960000000 | 0.0000000000 |
| N | -11.6120000000 | -12.0010000000 | 0.0000000000 |
| N | -10.3910000000 | -9.8860000000  | 0.0000000000 |
| B | -11.6120000000 | -9.1810000000  | 0.0000000000 |
| B | -10.3910000000 | -7.0660000000  | 0.0000000000 |
| N | -11.6120000000 | -7.7710000000  | 0.0000000000 |
| N | -10.3910000000 | -5.6560000000  | 0.0000000000 |
| B | -11.6120000000 | -4.9510000000  | 0.0000000000 |
| B | -10.3910000000 | -2.8360000000  | 0.0000000000 |
| N | -11.6120000000 | -3.5410000000  | 0.0000000000 |
| N | -10.3910000000 | -1.4260000000  | 0.0000000000 |
| B | -11.6120000000 | -0.7210000000  | 0.0000000000 |
| B | -10.3910000000 | 1.3940000000   | 0.0000000000 |
| N | -11.6120000000 | 0.6890000000   | 0.0000000000 |
| N | -10.3910000000 | 2.8040000000   | 0.0000000000 |
| B | -11.6120000000 | 3.5090000000   | 0.0000000000 |
| B | -10.3910000000 | 5.6240000000   | 0.0000000000 |
| N | -11.6120000000 | 4.9190000000   | 0.0000000000 |
| N | -10.3910000000 | 7.0340000000   | 0.0000000000 |
| B | -11.6120000000 | 7.7390000000   | 0.0000000000 |
| B | -10.3910000000 | 9.8540000000   | 0.0000000000 |

|   |               |               |             |
|---|---------------|---------------|-------------|
| N | -11.612000000 | 9.149000000   | 0.000000000 |
| N | -10.391000000 | 11.264000000  | 0.000000000 |
| B | -11.612000000 | 11.969000000  | 0.000000000 |
| B | -10.391000000 | 14.084000000  | 0.000000000 |
| N | -11.612000000 | 13.379000000  | 0.000000000 |
| N | -10.391000000 | 15.494000000  | 0.000000000 |
| B | -11.612000000 | 16.199000000  | 0.000000000 |
| B | -7.948000000  | -15.526000000 | 0.000000000 |
| N | -9.169000000  | -16.231000000 | 0.000000000 |
| N | -7.948000000  | -14.116000000 | 0.000000000 |
| B | -9.169000000  | -13.411000000 | 0.000000000 |
| B | -7.948000000  | -11.296000000 | 0.000000000 |
| N | -9.169000000  | -12.001000000 | 0.000000000 |
| N | -7.948000000  | -9.886000000  | 0.000000000 |
| B | -9.169000000  | -9.181000000  | 0.000000000 |
| B | -7.948000000  | -7.066000000  | 0.000000000 |
| N | -9.169000000  | -7.771000000  | 0.000000000 |
| N | -7.948000000  | -5.656000000  | 0.000000000 |
| B | -9.169000000  | -4.951000000  | 0.000000000 |
| B | -7.948000000  | -2.836000000  | 0.000000000 |
| N | -9.169000000  | -3.541000000  | 0.000000000 |
| N | -7.948000000  | -1.426000000  | 0.000000000 |
| B | -9.169000000  | -0.721000000  | 0.000000000 |
| B | -7.948000000  | 1.394000000   | 0.000000000 |
| N | -9.169000000  | 0.689000000   | 0.000000000 |
| N | -7.948000000  | 2.804000000   | 0.000000000 |
| B | -9.169000000  | 3.509000000   | 0.000000000 |
| B | -7.948000000  | 5.624000000   | 0.000000000 |
| N | -9.169000000  | 4.919000000   | 0.000000000 |
| N | -7.948000000  | 7.034000000   | 0.000000000 |
| B | -9.169000000  | 7.739000000   | 0.000000000 |
| B | -7.948000000  | 9.854000000   | 0.000000000 |
| N | -9.169000000  | 9.149000000   | 0.000000000 |
| N | -7.948000000  | 11.264000000  | 0.000000000 |
| B | -9.169000000  | 11.969000000  | 0.000000000 |
| B | -7.948000000  | 14.084000000  | 0.000000000 |
| N | -9.169000000  | 13.379000000  | 0.000000000 |
| N | -7.948000000  | 15.494000000  | 0.000000000 |
| B | -9.169000000  | 16.199000000  | 0.000000000 |
| B | -5.506000000  | -15.526000000 | 0.000000000 |
| N | -6.727000000  | -16.231000000 | 0.000000000 |
| N | -5.506000000  | -14.116000000 | 0.000000000 |
| B | -6.727000000  | -13.411000000 | 0.000000000 |
| B | -5.506000000  | -11.296000000 | 0.000000000 |
| N | -6.727000000  | -12.001000000 | 0.000000000 |
| N | -5.506000000  | -9.886000000  | 0.000000000 |
| B | -6.727000000  | -9.181000000  | 0.000000000 |
| B | -5.506000000  | -7.066000000  | 0.000000000 |
| N | -6.727000000  | -7.771000000  | 0.000000000 |
| N | -5.506000000  | -5.656000000  | 0.000000000 |
| B | -6.727000000  | -4.951000000  | 0.000000000 |
| B | -5.506000000  | -2.836000000  | 0.000000000 |
| N | -6.727000000  | -3.541000000  | 0.000000000 |
| N | -5.506000000  | -1.426000000  | 0.000000000 |
| B | -6.727000000  | -0.721000000  | 0.000000000 |
| B | -5.506000000  | 1.394000000   | 0.000000000 |
| N | -6.727000000  | 0.689000000   | 0.000000000 |
| N | -5.506000000  | 2.804000000   | 0.000000000 |
| B | -6.727000000  | 3.509000000   | 0.000000000 |
| B | -5.506000000  | 5.624000000   | 0.000000000 |
| N | -6.727000000  | 4.919000000   | 0.000000000 |
| N | -5.506000000  | 7.034000000   | 0.000000000 |
| B | -6.727000000  | 7.739000000   | 0.000000000 |
| B | -5.506000000  | 9.854000000   | 0.000000000 |
| N | -6.727000000  | 9.149000000   | 0.000000000 |
| N | -5.506000000  | 11.264000000  | 0.000000000 |
| B | -6.727000000  | 11.969000000  | 0.000000000 |
| B | -5.506000000  | 14.084000000  | 0.000000000 |
| N | -6.727000000  | 13.379000000  | 0.000000000 |
| N | -5.506000000  | 15.494000000  | 0.000000000 |
| B | -6.727000000  | 16.199000000  | 0.000000000 |
| B | -3.064000000  | -15.526000000 | 0.000000000 |
| N | -4.285000000  | -16.231000000 | 0.000000000 |
| N | -3.064000000  | -14.116000000 | 0.000000000 |
| B | -4.285000000  | -13.411000000 | 0.000000000 |



|   |              |               |             |
|---|--------------|---------------|-------------|
| B | -3.064000000 | -11.296000000 | 0.000000000 |
| N | -4.285000000 | -12.001000000 | 0.000000000 |
| N | -3.064000000 | -9.886000000  | 0.000000000 |
| B | -4.285000000 | -9.181000000  | 0.000000000 |
| B | -3.064000000 | -7.066000000  | 0.000000000 |
| N | -4.285000000 | -7.771000000  | 0.000000000 |
| N | -3.064000000 | -5.656000000  | 0.000000000 |
| B | -4.285000000 | -4.951000000  | 0.000000000 |
| N | -4.285000000 | -3.541000000  | 0.000000000 |
| N | -3.064000000 | 2.804000000   | 0.000000000 |
| B | -4.285000000 | 3.509000000   | 0.000000000 |
| B | -3.064000000 | 5.624000000   | 0.000000000 |
| N | -4.285000000 | 4.919000000   | 0.000000000 |
| N | -3.064000000 | 7.034000000   | 0.000000000 |
| B | -4.285000000 | 7.739000000   | 0.000000000 |
| B | -3.064000000 | 9.854000000   | 0.000000000 |
| N | -4.285000000 | 9.149000000   | 0.000000000 |
| N | -3.064000000 | 11.264000000  | 0.000000000 |
| B | -4.285000000 | 11.969000000  | 0.000000000 |
| B | -3.064000000 | 14.084000000  | 0.000000000 |
| N | -4.285000000 | 13.379000000  | 0.000000000 |
| N | -3.064000000 | 15.494000000  | 0.000000000 |
| B | -4.285000000 | 16.199000000  | 0.000000000 |
| B | -0.622000000 | -15.526000000 | 0.000000000 |
| N | -1.843000000 | -16.231000000 | 0.000000000 |
| N | -0.622000000 | -14.116000000 | 0.000000000 |
| B | -1.843000000 | -13.411000000 | 0.000000000 |
| B | -0.622000000 | -11.296000000 | 0.000000000 |
| N | -1.843000000 | -12.001000000 | 0.000000000 |
| N | -0.622000000 | -9.886000000  | 0.000000000 |
| B | -1.843000000 | -9.181000000  | 0.000000000 |
| B | -0.622000000 | -7.066000000  | 0.000000000 |
| N | -1.843000000 | -7.771000000  | 0.000000000 |
| N | -0.622000000 | -5.656000000  | 0.000000000 |
| B | -1.843000000 | -4.951000000  | 0.000000000 |
| N | -0.622000000 | 2.804000000   | 0.000000000 |
| B | -1.843000000 | 3.509000000   | 0.000000000 |
| B | -0.622000000 | 5.624000000   | 0.000000000 |
| N | -1.843000000 | 4.919000000   | 0.000000000 |
| N | -0.622000000 | 7.034000000   | 0.000000000 |
| B | -1.843000000 | 7.739000000   | 0.000000000 |
| B | -0.622000000 | 9.854000000   | 0.000000000 |
| N | -1.843000000 | 9.149000000   | 0.000000000 |
| N | -0.622000000 | 11.264000000  | 0.000000000 |
| B | -1.843000000 | 11.969000000  | 0.000000000 |
| B | -0.622000000 | 14.084000000  | 0.000000000 |
| N | -1.843000000 | 13.379000000  | 0.000000000 |
| N | -0.622000000 | 15.494000000  | 0.000000000 |
| B | -1.843000000 | 16.199000000  | 0.000000000 |
| B | 1.820000000  | -15.526000000 | 0.000000000 |
| N | 0.599000000  | -16.231000000 | 0.000000000 |
| N | 1.820000000  | -14.116000000 | 0.000000000 |
| B | 0.599000000  | -13.411000000 | 0.000000000 |
| B | 1.820000000  | -11.296000000 | 0.000000000 |
| N | 0.599000000  | -12.001000000 | 0.000000000 |
| N | 1.820000000  | -9.886000000  | 0.000000000 |
| B | 0.599000000  | -9.181000000  | 0.000000000 |
| B | 1.820000000  | -7.066000000  | 0.000000000 |
| N | 0.599000000  | -7.771000000  | 0.000000000 |
| N | 1.820000000  | -5.656000000  | 0.000000000 |
| B | 0.599000000  | -4.951000000  | 0.000000000 |
| N | 1.820000000  | 2.804000000   | 0.000000000 |
| B | 0.599000000  | 3.509000000   | 0.000000000 |
| B | 1.820000000  | 5.624000000   | 0.000000000 |
| N | 0.599000000  | 4.919000000   | 0.000000000 |
| N | 1.820000000  | 7.034000000   | 0.000000000 |
| B | 0.599000000  | 7.739000000   | 0.000000000 |
| B | 1.820000000  | 9.854000000   | 0.000000000 |
| N | 0.599000000  | 9.149000000   | 0.000000000 |
| N | 1.820000000  | 11.264000000  | 0.000000000 |
| B | 0.599000000  | 11.969000000  | 0.000000000 |
| B | 1.820000000  | 14.084000000  | 0.000000000 |
| N | 0.599000000  | 13.379000000  | 0.000000000 |
| N | 1.820000000  | 15.494000000  | 0.000000000 |
| B | 0.599000000  | 16.199000000  | 0.000000000 |

|   |             |               |             |
|---|-------------|---------------|-------------|
| B | 4.263000000 | -15.526000000 | 0.000000000 |
| N | 3.042000000 | -16.231000000 | 0.000000000 |
| N | 4.263000000 | -14.116000000 | 0.000000000 |
| B | 3.042000000 | -13.411000000 | 0.000000000 |
| B | 4.263000000 | -11.296000000 | 0.000000000 |
| N | 3.042000000 | -12.001000000 | 0.000000000 |
| N | 4.263000000 | -9.886000000  | 0.000000000 |
| B | 3.042000000 | -9.181000000  | 0.000000000 |
| B | 4.263000000 | -7.066000000  | 0.000000000 |
| N | 3.042000000 | -7.771000000  | 0.000000000 |
| N | 4.263000000 | -5.656000000  | 0.000000000 |
| B | 3.042000000 | -4.951000000  | 0.000000000 |
| B | 4.263000000 | -2.836000000  | 0.000000000 |
| N | 3.042000000 | -3.541000000  | 0.000000000 |
| N | 4.263000000 | -1.426000000  | 0.000000000 |
| B | 4.263000000 | 1.394000000   | 0.000000000 |
| N | 4.263000000 | 2.804000000   | 0.000000000 |
| B | 3.042000000 | 3.509000000   | 0.000000000 |
| B | 4.263000000 | 5.624000000   | 0.000000000 |
| N | 3.042000000 | 4.919000000   | 0.000000000 |
| N | 4.263000000 | 7.034000000   | 0.000000000 |
| B | 3.042000000 | 7.739000000   | 0.000000000 |
| B | 4.263000000 | 9.854000000   | 0.000000000 |
| N | 3.042000000 | 9.149000000   | 0.000000000 |
| N | 4.263000000 | 11.264000000  | 0.000000000 |
| B | 3.042000000 | 11.969000000  | 0.000000000 |
| B | 4.263000000 | 14.084000000  | 0.000000000 |
| N | 3.042000000 | 13.379000000  | 0.000000000 |
| N | 4.263000000 | 15.494000000  | 0.000000000 |
| B | 3.042000000 | 16.199000000  | 0.000000000 |
| B | 6.705000000 | -15.526000000 | 0.000000000 |
| N | 5.484000000 | -16.231000000 | 0.000000000 |
| N | 6.705000000 | -14.116000000 | 0.000000000 |
| B | 5.484000000 | -13.411000000 | 0.000000000 |
| B | 6.705000000 | -11.296000000 | 0.000000000 |
| N | 5.484000000 | -12.001000000 | 0.000000000 |
| N | 6.705000000 | -9.886000000  | 0.000000000 |
| B | 5.484000000 | -9.181000000  | 0.000000000 |
| B | 6.705000000 | -7.066000000  | 0.000000000 |
| N | 5.484000000 | -7.771000000  | 0.000000000 |
| N | 6.705000000 | -5.656000000  | 0.000000000 |
| B | 5.484000000 | -4.951000000  | 0.000000000 |
| B | 6.705000000 | -2.836000000  | 0.000000000 |
| N | 5.484000000 | -3.541000000  | 0.000000000 |
| N | 6.705000000 | -1.426000000  | 0.000000000 |
| B | 5.484000000 | -0.721000000  | 0.000000000 |
| B | 6.705000000 | 1.394000000   | 0.000000000 |
| N | 5.484000000 | 0.689000000   | 0.000000000 |
| N | 6.705000000 | 2.804000000   | 0.000000000 |
| B | 5.484000000 | 3.509000000   | 0.000000000 |
| B | 6.705000000 | 5.624000000   | 0.000000000 |
| N | 5.484000000 | 4.919000000   | 0.000000000 |
| N | 6.705000000 | 7.034000000   | 0.000000000 |
| B | 5.484000000 | 7.739000000   | 0.000000000 |
| B | 6.705000000 | 9.854000000   | 0.000000000 |
| N | 5.484000000 | 9.149000000   | 0.000000000 |
| N | 6.705000000 | 11.264000000  | 0.000000000 |
| B | 5.484000000 | 11.969000000  | 0.000000000 |
| B | 6.705000000 | 14.084000000  | 0.000000000 |
| N | 5.484000000 | 13.379000000  | 0.000000000 |
| N | 6.705000000 | 15.494000000  | 0.000000000 |
| B | 5.484000000 | 16.199000000  | 0.000000000 |
| B | 9.147000000 | -15.526000000 | 0.000000000 |
| N | 7.926000000 | -16.231000000 | 0.000000000 |
| N | 9.147000000 | -14.116000000 | 0.000000000 |
| B | 7.926000000 | -13.411000000 | 0.000000000 |
| B | 9.147000000 | -11.296000000 | 0.000000000 |
| N | 7.926000000 | -12.001000000 | 0.000000000 |
| N | 9.147000000 | -9.886000000  | 0.000000000 |
| B | 7.926000000 | -9.181000000  | 0.000000000 |
| B | 9.147000000 | -7.066000000  | 0.000000000 |
| N | 7.926000000 | -7.771000000  | 0.000000000 |
| N | 9.147000000 | -5.656000000  | 0.000000000 |
| B | 7.926000000 | -4.951000000  | 0.000000000 |
| B | 9.147000000 | -2.836000000  | 0.000000000 |

|   |              |               |             |
|---|--------------|---------------|-------------|
| N | 7.926000000  | -3.541000000  | 0.000000000 |
| N | 9.147000000  | -1.426000000  | 0.000000000 |
| B | 7.926000000  | -0.721000000  | 0.000000000 |
| B | 9.147000000  | 1.394000000   | 0.000000000 |
| N | 7.926000000  | 0.689000000   | 0.000000000 |
| N | 9.147000000  | 2.804000000   | 0.000000000 |
| B | 7.926000000  | 3.509000000   | 0.000000000 |
| B | 9.147000000  | 5.624000000   | 0.000000000 |
| N | 7.926000000  | 4.919000000   | 0.000000000 |
| N | 9.147000000  | 7.034000000   | 0.000000000 |
| B | 7.926000000  | 7.739000000   | 0.000000000 |
| B | 9.147000000  | 9.854000000   | 0.000000000 |
| N | 7.926000000  | 9.149000000   | 0.000000000 |
| N | 9.147000000  | 11.264000000  | 0.000000000 |
| B | 7.926000000  | 11.969000000  | 0.000000000 |
| B | 9.147000000  | 14.084000000  | 0.000000000 |
| N | 7.926000000  | 13.379000000  | 0.000000000 |
| N | 9.147000000  | 15.494000000  | 0.000000000 |
| B | 7.926000000  | 16.199000000  | 0.000000000 |
| B | 11.589000000 | -15.526000000 | 0.000000000 |
| N | 10.368000000 | -16.231000000 | 0.000000000 |
| N | 11.589000000 | -14.116000000 | 0.000000000 |
| B | 10.368000000 | -13.411000000 | 0.000000000 |
| B | 11.589000000 | -11.296000000 | 0.000000000 |
| N | 10.368000000 | -12.001000000 | 0.000000000 |
| N | 11.589000000 | -9.886000000  | 0.000000000 |
| B | 10.368000000 | -9.181000000  | 0.000000000 |
| B | 11.589000000 | -7.066000000  | 0.000000000 |
| N | 10.368000000 | -7.771000000  | 0.000000000 |
| N | 11.589000000 | -5.656000000  | 0.000000000 |
| B | 10.368000000 | -4.951000000  | 0.000000000 |
| B | 11.589000000 | -2.836000000  | 0.000000000 |
| N | 10.368000000 | -3.541000000  | 0.000000000 |
| N | 11.589000000 | -1.426000000  | 0.000000000 |
| B | 10.368000000 | -0.721000000  | 0.000000000 |
| B | 11.589000000 | 1.394000000   | 0.000000000 |
| N | 10.368000000 | 0.689000000   | 0.000000000 |
| N | 11.589000000 | 2.804000000   | 0.000000000 |
| B | 10.368000000 | 3.509000000   | 0.000000000 |
| B | 11.589000000 | 5.624000000   | 0.000000000 |
| N | 10.368000000 | 4.919000000   | 0.000000000 |
| N | 11.589000000 | 7.034000000   | 0.000000000 |
| B | 10.368000000 | 7.739000000   | 0.000000000 |
| B | 11.589000000 | 9.854000000   | 0.000000000 |
| N | 10.368000000 | 9.149000000   | 0.000000000 |
| N | 11.589000000 | 11.264000000  | 0.000000000 |
| B | 10.368000000 | 11.969000000  | 0.000000000 |
| B | 11.589000000 | 14.084000000  | 0.000000000 |
| N | 10.368000000 | 13.379000000  | 0.000000000 |
| N | 11.589000000 | 15.494000000  | 0.000000000 |
| B | 10.368000000 | 16.199000000  | 0.000000000 |
| B | 14.031000000 | -15.526000000 | 0.000000000 |
| N | 12.810000000 | -16.231000000 | 0.000000000 |
| N | 14.031000000 | -14.116000000 | 0.000000000 |
| B | 12.810000000 | -13.411000000 | 0.000000000 |
| B | 14.031000000 | -11.296000000 | 0.000000000 |
| N | 12.810000000 | -12.001000000 | 0.000000000 |
| N | 14.031000000 | -9.886000000  | 0.000000000 |
| B | 12.810000000 | -9.181000000  | 0.000000000 |
| B | 14.031000000 | -7.066000000  | 0.000000000 |
| N | 12.810000000 | -7.771000000  | 0.000000000 |
| N | 14.031000000 | -5.656000000  | 0.000000000 |
| B | 12.810000000 | -4.951000000  | 0.000000000 |
| B | 14.031000000 | -2.836000000  | 0.000000000 |
| N | 12.810000000 | -3.541000000  | 0.000000000 |
| N | 14.031000000 | -1.426000000  | 0.000000000 |
| B | 12.810000000 | -0.721000000  | 0.000000000 |
| B | 14.031000000 | 1.394000000   | 0.000000000 |
| N | 12.810000000 | 0.689000000   | 0.000000000 |
| N | 14.031000000 | 2.804000000   | 0.000000000 |
| B | 12.810000000 | 3.509000000   | 0.000000000 |
| B | 14.031000000 | 5.624000000   | 0.000000000 |
| N | 12.810000000 | 4.919000000   | 0.000000000 |
| N | 14.031000000 | 7.034000000   | 0.000000000 |
| B | 12.810000000 | 7.739000000   | 0.000000000 |

|   |               |                |              |
|---|---------------|----------------|--------------|
| B | 14.0310000000 | 9.8540000000   | 0.0000000000 |
| N | 12.8100000000 | 9.1490000000   | 0.0000000000 |
| N | 14.0310000000 | 11.2640000000  | 0.0000000000 |
| B | 12.8100000000 | 11.9690000000  | 0.0000000000 |
| B | 14.0310000000 | 14.0840000000  | 0.0000000000 |
| N | 12.8100000000 | 13.3790000000  | 0.0000000000 |
| N | 14.0310000000 | 15.4940000000  | 0.0000000000 |
| B | 12.8100000000 | 16.1990000000  | 0.0000000000 |
| B | 16.4740000000 | -15.5260000000 | 0.0000000000 |
| N | 15.2520000000 | -16.2310000000 | 0.0000000000 |
| N | 16.4740000000 | -14.1160000000 | 0.0000000000 |
| B | 15.2520000000 | -13.4110000000 | 0.0000000000 |
| B | 16.4740000000 | -11.2960000000 | 0.0000000000 |
| N | 15.2520000000 | -12.0010000000 | 0.0000000000 |
| N | 16.4740000000 | -9.8860000000  | 0.0000000000 |
| B | 15.2520000000 | -9.1810000000  | 0.0000000000 |
| B | 16.4740000000 | -7.0660000000  | 0.0000000000 |
| N | 15.2520000000 | -7.7710000000  | 0.0000000000 |
| N | 16.4740000000 | -5.6560000000  | 0.0000000000 |
| B | 15.2520000000 | -4.9510000000  | 0.0000000000 |
| B | 16.4740000000 | -2.8360000000  | 0.0000000000 |
| N | 15.2520000000 | -3.5410000000  | 0.0000000000 |
| N | 16.4740000000 | -1.4260000000  | 0.0000000000 |
| B | 15.2520000000 | -0.7210000000  | 0.0000000000 |
| B | 16.4740000000 | 1.3940000000   | 0.0000000000 |
| N | 15.2520000000 | 0.6890000000   | 0.0000000000 |
| N | 16.4740000000 | 2.8040000000   | 0.0000000000 |
| B | 15.2520000000 | 3.5090000000   | 0.0000000000 |
| B | 16.4740000000 | 5.6240000000   | 0.0000000000 |
| N | 15.2520000000 | 4.9190000000   | 0.0000000000 |
| N | 16.4740000000 | 7.0340000000   | 0.0000000000 |
| B | 15.2520000000 | 7.7390000000   | 0.0000000000 |
| B | 16.4740000000 | 9.8540000000   | 0.0000000000 |
| N | 15.2520000000 | 9.1490000000   | 0.0000000000 |
| N | 16.4740000000 | 11.2640000000  | 0.0000000000 |
| B | 15.2520000000 | 11.9690000000  | 0.0000000000 |
| B | 16.4740000000 | 14.0840000000  | 0.0000000000 |
| N | 15.2520000000 | 13.3790000000  | 0.0000000000 |
| N | 16.4740000000 | 15.4940000000  | 0.0000000000 |
| B | 15.2520000000 | 16.1990000000  | 0.0000000000 |
| F | -3.0760000000 | 1.4280000000   | 0.0000000000 |
| F | -0.6150000000 | 1.4260000000   | 0.0000000000 |
| F | 1.8300000000  | 1.4150000000   | 0.0000000000 |
| F | -4.3280000000 | -0.7310000000  | 0.0000000000 |
| F | -3.1370000000 | -2.8460000000  | 0.0000000000 |
| F | 1.8430000000  | -2.8550000000  | 0.0000000000 |
| F | 3.0820000000  | -0.7670000000  | 0.0000000000 |
| H | -4.4830000000 | 0.8230000000   | 0.0000000000 |
| H | 3.2620000000  | 0.7990000000   | 0.0000000000 |
| H | 0.5870000000  | -3.7740000000  | 0.0000000000 |
| H | -1.8360000000 | -3.7550000000  | 0.0000000000 |

**Pore 4.** (The final potential energy from DFT calculations: -14935.12 Hartree)

|   |               |                |              |
|---|---------------|----------------|--------------|
| B | 15.6770000000 | -15.5640000000 | 0.0000000000 |
| B | 13.1670000000 | -15.5640000000 | 0.0000000000 |
| B | 10.6570000000 | -15.5640000000 | 0.0000000000 |
| B | 8.1470000000  | -15.5640000000 | 0.0000000000 |
| N | 14.4190000000 | -14.8380000000 | 0.0000000000 |
| B | 5.6370000000  | -15.5640000000 | 0.0000000000 |
| N | 11.9090000000 | -14.8380000000 | 0.0000000000 |
| B | 3.1270000000  | -15.5640000000 | 0.0000000000 |
| N | 9.3990000000  | -14.8380000000 | 0.0000000000 |
| B | 0.6170000000  | -15.5640000000 | 0.0000000000 |
| N | 6.8890000000  | -14.8380000000 | 0.0000000000 |
| B | -1.8930000000 | -15.5640000000 | 0.0000000000 |
| N | 4.3790000000  | -14.8380000000 | 0.0000000000 |
| B | -4.4030000000 | -15.5640000000 | 0.0000000000 |
| N | 1.8690000000  | -14.8380000000 | 0.0000000000 |
| B | -6.9130000000 | -15.5640000000 | 0.0000000000 |
| B | 14.4220000000 | -13.3900000000 | 0.0000000000 |

|   |                |                |              |
|---|----------------|----------------|--------------|
| N | -0.6410000000  | -14.8380000000 | 0.0000000000 |
| B | -9.4230000000  | -15.5640000000 | 0.0000000000 |
| N | 11.9120000000  | -13.3900000000 | 0.0000000000 |
| B | -3.1510000000  | -14.8380000000 | 0.0000000000 |
| N | -11.9330000000 | -15.5640000000 | 0.0000000000 |
| B | 9.4020000000   | -13.3900000000 | 0.0000000000 |
| N | -5.6610000000  | -14.8380000000 | 0.0000000000 |
| B | 15.6740000000  | -12.6640000000 | 0.0000000000 |
| N | -14.4430000000 | -15.5640000000 | 0.0000000000 |
| B | 6.8920000000   | -13.3900000000 | 0.0000000000 |
| N | -8.1710000000  | -14.8380000000 | 0.0000000000 |
| B | 13.1640000000  | -12.6640000000 | 0.0000000000 |
| N | 4.3820000000   | -13.3900000000 | 0.0000000000 |
| B | -10.6810000000 | -14.8380000000 | 0.0000000000 |
| N | 10.6540000000  | -12.6640000000 | 0.0000000000 |
| B | 1.8720000000   | -13.3900000000 | 0.0000000000 |
| N | -13.1910000000 | -14.8380000000 | 0.0000000000 |
| B | 8.1440000000   | -12.6640000000 | 0.0000000000 |
| N | -0.6380000000  | -13.3900000000 | 0.0000000000 |
| B | -15.7010000000 | -14.8380000000 | 0.0000000000 |
| N | 5.6340000000   | -12.6640000000 | 0.0000000000 |
| B | -3.1480000000  | -13.3900000000 | 0.0000000000 |
| N | 3.1240000000   | -12.6640000000 | 0.0000000000 |
| B | -5.6580000000  | -13.3900000000 | 0.0000000000 |
| N | 15.6770000000  | -11.2160000000 | 0.0000000000 |
| B | 0.6140000000   | -12.6640000000 | 0.0000000000 |
| N | -8.1680000000  | -13.3900000000 | 0.0000000000 |
| B | 13.1670000000  | -11.2160000000 | 0.0000000000 |
| N | -1.8960000000  | -12.6640000000 | 0.0000000000 |
| B | -10.6780000000 | -13.3900000000 | 0.0000000000 |
| N | 10.6570000000  | -11.2160000000 | 0.0000000000 |
| B | -4.4060000000  | -12.6640000000 | 0.0000000000 |
| N | -13.1880000000 | -13.3900000000 | 0.0000000000 |
| B | 8.1470000000   | -11.2160000000 | 0.0000000000 |
| N | -6.9160000000  | -12.6640000000 | 0.0000000000 |
| B | 14.4190000000  | -10.4900000000 | 0.0000000000 |
| N | -15.6980000000 | -13.3900000000 | 0.0000000000 |
| B | 5.6370000000   | -11.2160000000 | 0.0000000000 |
| N | -9.4260000000  | -12.6640000000 | 0.0000000000 |
| B | 11.9090000000  | -10.4900000000 | 0.0000000000 |
| N | 3.1270000000   | -11.2160000000 | 0.0000000000 |
| B | -11.9360000000 | -12.6640000000 | 0.0000000000 |
| N | 9.3990000000   | -10.4900000000 | 0.0000000000 |
| B | 0.6170000000   | -11.2160000000 | 0.0000000000 |
| N | -14.4460000000 | -12.6640000000 | 0.0000000000 |
| B | 6.8890000000   | -10.4900000000 | 0.0000000000 |
| N | -1.8930000000  | -11.2160000000 | 0.0000000000 |
| B | 4.3790000000   | -10.4900000000 | 0.0000000000 |
| N | -4.4030000000  | -11.2160000000 | 0.0000000000 |
| B | 1.8690000000   | -10.4900000000 | 0.0000000000 |
| N | -6.9130000000  | -11.2160000000 | 0.0000000000 |
| B | 14.4220000000  | -9.0420000000  | 0.0000000000 |
| N | -0.6410000000  | -10.4900000000 | 0.0000000000 |
| B | -9.4230000000  | -11.2160000000 | 0.0000000000 |
| N | 11.9120000000  | -9.0420000000  | 0.0000000000 |
| B | -3.1510000000  | -10.4900000000 | 0.0000000000 |
| N | -11.9330000000 | -11.2160000000 | 0.0000000000 |
| B | 9.4020000000   | -9.0420000000  | 0.0000000000 |
| N | -5.6610000000  | -10.4900000000 | 0.0000000000 |
| B | 15.6740000000  | -8.3160000000  | 0.0000000000 |
| N | -14.4430000000 | -11.2160000000 | 0.0000000000 |
| B | 6.8920000000   | -9.0420000000  | 0.0000000000 |
| N | -8.1710000000  | -10.4900000000 | 0.0000000000 |
| B | 13.1640000000  | -8.3160000000  | 0.0000000000 |
| N | 4.3820000000   | -9.0420000000  | 0.0000000000 |
| B | -10.6810000000 | -10.4900000000 | 0.0000000000 |
| N | 10.6540000000  | -8.3160000000  | 0.0000000000 |
| B | 1.8720000000   | -9.0420000000  | 0.0000000000 |
| N | -13.1910000000 | -10.4900000000 | 0.0000000000 |
| B | 8.1440000000   | -8.3160000000  | 0.0000000000 |
| N | -0.6380000000  | -9.0420000000  | 0.0000000000 |
| B | -15.7010000000 | -10.4900000000 | 0.0000000000 |
| N | 5.6340000000   | -8.3160000000  | 0.0000000000 |
| B | -3.1480000000  | -9.0420000000  | 0.0000000000 |
| N | 3.1240000000   | -8.3160000000  | 0.0000000000 |

|   |               |              |             |
|---|---------------|--------------|-------------|
| B | -5.658000000  | -9.042000000 | 0.000000000 |
| B | 15.677000000  | -6.869000000 | 0.000000000 |
| N | 0.614000000   | -8.316000000 | 0.000000000 |
| B | -8.168000000  | -9.042000000 | 0.000000000 |
| B | 13.167000000  | -6.869000000 | 0.000000000 |
| N | -1.896000000  | -8.316000000 | 0.000000000 |
| B | -10.678000000 | -9.042000000 | 0.000000000 |
| B | 10.657000000  | -6.869000000 | 0.000000000 |
| N | -4.406000000  | -8.316000000 | 0.000000000 |
| B | -13.188000000 | -9.042000000 | 0.000000000 |
| B | 8.147000000   | -6.869000000 | 0.000000000 |
| N | -6.916000000  | -8.316000000 | 0.000000000 |
| N | 14.419000000  | -6.143000000 | 0.000000000 |
| B | -15.698000000 | -9.042000000 | 0.000000000 |
| B | 5.637000000   | -6.869000000 | 0.000000000 |
| N | -9.426000000  | -8.316000000 | 0.000000000 |
| N | 11.909000000  | -6.143000000 | 0.000000000 |
| B | 3.127000000   | -6.869000000 | 0.000000000 |
| N | -11.936000000 | -8.316000000 | 0.000000000 |
| N | 9.399000000   | -6.143000000 | 0.000000000 |
| B | 0.617000000   | -6.869000000 | 0.000000000 |
| N | -14.446000000 | -8.316000000 | 0.000000000 |
| N | 6.889000000   | -6.143000000 | 0.000000000 |
| B | -1.893000000  | -6.869000000 | 0.000000000 |
| N | 4.379000000   | -6.143000000 | 0.000000000 |
| B | -4.403000000  | -6.869000000 | 0.000000000 |
| N | 1.869000000   | -6.143000000 | 0.000000000 |
| B | -6.913000000  | -6.869000000 | 0.000000000 |
| B | 14.422000000  | -4.695000000 | 0.000000000 |
| N | -0.641000000  | -6.143000000 | 0.000000000 |
| B | -9.423000000  | -6.869000000 | 0.000000000 |
| B | 11.912000000  | -4.695000000 | 0.000000000 |
| N | -3.151000000  | -6.143000000 | 0.000000000 |
| B | -11.933000000 | -6.869000000 | 0.000000000 |
| B | 9.402000000   | -4.695000000 | 0.000000000 |
| N | -5.661000000  | -6.143000000 | 0.000000000 |
| N | 15.674000000  | -3.969000000 | 0.000000000 |
| B | -14.443000000 | -6.869000000 | 0.000000000 |
| B | 6.892000000   | -4.695000000 | 0.000000000 |
| N | -8.171000000  | -6.143000000 | 0.000000000 |
| N | 13.164000000  | -3.969000000 | 0.000000000 |
| B | 4.382000000   | -4.695000000 | 0.000000000 |
| N | -10.681000000 | -6.143000000 | 0.000000000 |
| N | 10.654000000  | -3.969000000 | 0.000000000 |
| B | 1.872000000   | -4.695000000 | 0.000000000 |
| N | -13.191000000 | -6.143000000 | 0.000000000 |
| N | 8.144000000   | -3.969000000 | 0.000000000 |
| B | -0.638000000  | -4.695000000 | 0.000000000 |
| N | -15.701000000 | -6.143000000 | 0.000000000 |
| N | 5.634000000   | -3.969000000 | 0.000000000 |
| B | -3.148000000  | -4.695000000 | 0.000000000 |
| N | 3.124000000   | -3.969000000 | 0.000000000 |
| B | -5.658000000  | -4.695000000 | 0.000000000 |
| B | 15.677000000  | -2.521000000 | 0.000000000 |
| N | 0.614000000   | -3.969000000 | 0.000000000 |
| B | -8.168000000  | -4.695000000 | 0.000000000 |
| B | 13.167000000  | -2.521000000 | 0.000000000 |
| N | -1.896000000  | -3.969000000 | 0.000000000 |
| B | -10.678000000 | -4.695000000 | 0.000000000 |
| B | 10.657000000  | -2.521000000 | 0.000000000 |
| N | -4.406000000  | -3.969000000 | 0.000000000 |
| B | -13.188000000 | -4.695000000 | 0.000000000 |
| B | 8.147000000   | -2.521000000 | 0.000000000 |
| N | -6.916000000  | -3.969000000 | 0.000000000 |
| N | 14.419000000  | -1.795000000 | 0.000000000 |
| B | -15.698000000 | -4.695000000 | 0.000000000 |
| B | 5.637000000   | -2.521000000 | 0.000000000 |
| N | -9.426000000  | -3.969000000 | 0.000000000 |
| N | 11.909000000  | -1.795000000 | 0.000000000 |
| B | 3.127000000   | -2.521000000 | 0.000000000 |
| N | -11.936000000 | -3.969000000 | 0.000000000 |
| N | 9.399000000   | -1.795000000 | 0.000000000 |
| N | -14.446000000 | -3.969000000 | 0.000000000 |
| N | 6.889000000   | -1.795000000 | 0.000000000 |
| N | 4.379000000   | -1.795000000 | 0.000000000 |

|   |               |              |             |
|---|---------------|--------------|-------------|
| B | -4.403000000  | -2.521000000 | 0.000000000 |
| B | -6.913000000  | -2.521000000 | 0.000000000 |
| B | 14.422000000  | -0.348000000 | 0.000000000 |
| B | -9.423000000  | -2.521000000 | 0.000000000 |
| B | 11.912000000  | -0.348000000 | 0.000000000 |
| B | -11.933000000 | -2.521000000 | 0.000000000 |
| B | 9.402000000   | -0.348000000 | 0.000000000 |
| N | -5.661000000  | -1.795000000 | 0.000000000 |
| N | 15.674000000  | 0.379000000  | 0.000000000 |
| B | -14.443000000 | -2.521000000 | 0.000000000 |
| B | 6.892000000   | -0.348000000 | 0.000000000 |
| N | -8.171000000  | -1.795000000 | 0.000000000 |
| N | 13.164000000  | 0.379000000  | 0.000000000 |
| B | 4.382000000   | -0.348000000 | 0.000000000 |
| N | -10.681000000 | -1.795000000 | 0.000000000 |
| N | 10.654000000  | 0.379000000  | 0.000000000 |
| N | -13.191000000 | -1.795000000 | 0.000000000 |
| N | 8.144000000   | 0.379000000  | 0.000000000 |
| N | -15.701000000 | -1.795000000 | 0.000000000 |
| N | 5.634000000   | 0.379000000  | 0.000000000 |
| B | -5.658000000  | -0.348000000 | 0.000000000 |
| B | 15.677000000  | 1.826000000  | 0.000000000 |
| B | -8.168000000  | -0.348000000 | 0.000000000 |
| B | 13.167000000  | 1.826000000  | 0.000000000 |
| B | -10.678000000 | -0.348000000 | 0.000000000 |
| B | 10.657000000  | 1.826000000  | 0.000000000 |
| B | -13.188000000 | -0.348000000 | 0.000000000 |
| B | 8.147000000   | 1.826000000  | 0.000000000 |
| N | -6.916000000  | 0.379000000  | 0.000000000 |
| N | 14.419000000  | 2.552000000  | 0.000000000 |
| B | -15.698000000 | -0.348000000 | 0.000000000 |
| B | 5.637000000   | 1.826000000  | 0.000000000 |
| N | -9.426000000  | 0.379000000  | 0.000000000 |
| N | 11.909000000  | 2.552000000  | 0.000000000 |
| N | -11.936000000 | 0.379000000  | 0.000000000 |
| N | 9.399000000   | 2.552000000  | 0.000000000 |
| N | -14.446000000 | 0.379000000  | 0.000000000 |
| N | 6.889000000   | 2.552000000  | 0.000000000 |
| N | 4.379000000   | 2.552000000  | 0.000000000 |
| B | -6.913000000  | 1.826000000  | 0.000000000 |
| B | 14.422000000  | 4.000000000  | 0.000000000 |
| B | -9.423000000  | 1.826000000  | 0.000000000 |
| B | 11.912000000  | 4.000000000  | 0.000000000 |
| B | -11.933000000 | 1.826000000  | 0.000000000 |
| B | 9.402000000   | 4.000000000  | 0.000000000 |
| N | -5.661000000  | 2.552000000  | 0.000000000 |
| N | 15.674000000  | 4.726000000  | 0.000000000 |
| B | -14.443000000 | 1.826000000  | 0.000000000 |
| B | 6.892000000   | 4.000000000  | 0.000000000 |
| N | -8.171000000  | 2.552000000  | 0.000000000 |
| N | 13.164000000  | 4.726000000  | 0.000000000 |
| B | 4.382000000   | 4.000000000  | 0.000000000 |
| N | -10.681000000 | 2.552000000  | 0.000000000 |
| N | 10.654000000  | 4.726000000  | 0.000000000 |
| N | -13.191000000 | 2.552000000  | 0.000000000 |
| N | 8.144000000   | 4.726000000  | 0.000000000 |
| N | -15.701000000 | 2.552000000  | 0.000000000 |
| N | 5.634000000   | 4.726000000  | 0.000000000 |
| N | 3.124000000   | 4.726000000  | 0.000000000 |
| B | -5.658000000  | 4.000000000  | 0.000000000 |
| B | 15.677000000  | 6.174000000  | 0.000000000 |
| B | -8.168000000  | 4.000000000  | 0.000000000 |
| B | 13.167000000  | 6.174000000  | 0.000000000 |
| B | -10.678000000 | 4.000000000  | 0.000000000 |
| B | 10.657000000  | 6.174000000  | 0.000000000 |
| N | -4.406000000  | 4.726000000  | 0.000000000 |
| B | -13.188000000 | 4.000000000  | 0.000000000 |
| B | 8.147000000   | 6.174000000  | 0.000000000 |
| N | -6.916000000  | 4.726000000  | 0.000000000 |
| N | 14.419000000  | 6.900000000  | 0.000000000 |
| B | -15.698000000 | 4.000000000  | 0.000000000 |
| B | 5.637000000   | 6.174000000  | 0.000000000 |
| N | -9.426000000  | 4.726000000  | 0.000000000 |
| N | 11.909000000  | 6.900000000  | 0.000000000 |
| B | 3.127000000   | 6.174000000  | 0.000000000 |

|   |                |               |              |
|---|----------------|---------------|--------------|
| N | -11.9360000000 | 4.7260000000  | 0.0000000000 |
| N | 9.3990000000   | 6.9000000000  | 0.0000000000 |
| B | 0.6170000000   | 6.1740000000  | 0.0000000000 |
| N | -14.4460000000 | 4.7260000000  | 0.0000000000 |
| N | 6.8890000000   | 6.9000000000  | 0.0000000000 |
| B | -1.8930000000  | 6.1740000000  | 0.0000000000 |
| N | 4.3790000000   | 6.9000000000  | 0.0000000000 |
| B | -4.4030000000  | 6.1740000000  | 0.0000000000 |
| N | 1.8690000000   | 6.9000000000  | 0.0000000000 |
| B | -6.9130000000  | 6.1740000000  | 0.0000000000 |
| B | 14.4220000000  | 8.3470000000  | 0.0000000000 |
| N | -0.6410000000  | 6.9000000000  | 0.0000000000 |
| B | -9.4230000000  | 6.1740000000  | 0.0000000000 |
| B | 11.9120000000  | 8.3470000000  | 0.0000000000 |
| N | -3.1510000000  | 6.9000000000  | 0.0000000000 |
| B | -11.9330000000 | 6.1740000000  | 0.0000000000 |
| B | 9.4020000000   | 8.3470000000  | 0.0000000000 |
| N | -5.6610000000  | 6.9000000000  | 0.0000000000 |
| N | 15.6740000000  | 9.0730000000  | 0.0000000000 |
| B | -14.4430000000 | 6.1740000000  | 0.0000000000 |
| B | 6.8920000000   | 8.3470000000  | 0.0000000000 |
| N | -8.1710000000  | 6.9000000000  | 0.0000000000 |
| N | 13.1640000000  | 9.0730000000  | 0.0000000000 |
| B | 4.3820000000   | 8.3470000000  | 0.0000000000 |
| N | -10.6810000000 | 6.9000000000  | 0.0000000000 |
| N | 10.6540000000  | 9.0730000000  | 0.0000000000 |
| B | 1.8720000000   | 8.3470000000  | 0.0000000000 |
| N | -13.1910000000 | 6.9000000000  | 0.0000000000 |
| N | 8.1440000000   | 9.0730000000  | 0.0000000000 |
| B | -0.6380000000  | 8.3470000000  | 0.0000000000 |
| N | -15.7010000000 | 6.9000000000  | 0.0000000000 |
| N | 5.6340000000   | 9.0730000000  | 0.0000000000 |
| B | -3.1480000000  | 8.3470000000  | 0.0000000000 |
| N | 3.1240000000   | 9.0730000000  | 0.0000000000 |
| B | -5.6580000000  | 8.3470000000  | 0.0000000000 |
| B | 15.6770000000  | 10.5210000000 | 0.0000000000 |
| N | 0.6140000000   | 9.0730000000  | 0.0000000000 |
| B | -8.1680000000  | 8.3470000000  | 0.0000000000 |
| B | 13.1670000000  | 10.5210000000 | 0.0000000000 |
| N | -1.8960000000  | 9.0730000000  | 0.0000000000 |
| B | -10.6780000000 | 8.3470000000  | 0.0000000000 |
| B | 10.6570000000  | 10.5210000000 | 0.0000000000 |
| N | -4.4060000000  | 9.0730000000  | 0.0000000000 |
| B | -13.1880000000 | 8.3470000000  | 0.0000000000 |
| B | 8.1470000000   | 10.5210000000 | 0.0000000000 |
| N | -6.9160000000  | 9.0730000000  | 0.0000000000 |
| N | 14.4190000000  | 11.2470000000 | 0.0000000000 |
| B | -15.6980000000 | 8.3470000000  | 0.0000000000 |
| B | 5.6370000000   | 10.5210000000 | 0.0000000000 |
| N | -9.4260000000  | 9.0730000000  | 0.0000000000 |
| N | 11.9090000000  | 11.2470000000 | 0.0000000000 |
| B | 3.1270000000   | 10.5210000000 | 0.0000000000 |
| N | -11.9360000000 | 9.0730000000  | 0.0000000000 |
| N | 9.3990000000   | 11.2470000000 | 0.0000000000 |
| B | 0.6170000000   | 10.5210000000 | 0.0000000000 |
| N | -14.4460000000 | 9.0730000000  | 0.0000000000 |
| N | 6.8890000000   | 11.2470000000 | 0.0000000000 |
| B | -1.8930000000  | 10.5210000000 | 0.0000000000 |
| N | 4.3790000000   | 11.2470000000 | 0.0000000000 |
| B | -4.4030000000  | 10.5210000000 | 0.0000000000 |
| N | 1.8690000000   | 11.2470000000 | 0.0000000000 |
| B | -6.9130000000  | 10.5210000000 | 0.0000000000 |
| B | 14.4220000000  | 12.6950000000 | 0.0000000000 |
| N | -0.6410000000  | 11.2470000000 | 0.0000000000 |
| B | -9.4230000000  | 10.5210000000 | 0.0000000000 |
| B | 11.9120000000  | 12.6950000000 | 0.0000000000 |
| N | -3.1510000000  | 11.2470000000 | 0.0000000000 |
| B | -11.9330000000 | 10.5210000000 | 0.0000000000 |
| B | 9.4020000000   | 12.6950000000 | 0.0000000000 |
| N | -5.6610000000  | 11.2470000000 | 0.0000000000 |
| N | 15.6740000000  | 13.4210000000 | 0.0000000000 |
| B | -14.4430000000 | 10.5210000000 | 0.0000000000 |
| B | 6.8920000000   | 12.6950000000 | 0.0000000000 |
| N | -8.1710000000  | 11.2470000000 | 0.0000000000 |
| N | 13.1640000000  | 13.4210000000 | 0.0000000000 |



|   |               |              |             |
|---|---------------|--------------|-------------|
| B | 4.382000000   | 12.695000000 | 0.000000000 |
| N | -10.681000000 | 11.247000000 | 0.000000000 |
| N | 10.654000000  | 13.421000000 | 0.000000000 |
| B | 1.872000000   | 12.695000000 | 0.000000000 |
| N | -13.191000000 | 11.247000000 | 0.000000000 |
| N | 8.144000000   | 13.421000000 | 0.000000000 |
| B | -0.638000000  | 12.695000000 | 0.000000000 |
| N | -15.701000000 | 11.247000000 | 0.000000000 |
| N | 5.634000000   | 13.421000000 | 0.000000000 |
| B | -3.148000000  | 12.695000000 | 0.000000000 |
| N | 3.124000000   | 13.421000000 | 0.000000000 |
| B | -5.658000000  | 12.695000000 | 0.000000000 |
| B | 15.677000000  | 14.869000000 | 0.000000000 |
| N | 0.614000000   | 13.421000000 | 0.000000000 |
| B | -8.168000000  | 12.695000000 | 0.000000000 |
| B | 13.167000000  | 14.869000000 | 0.000000000 |
| N | -1.896000000  | 13.421000000 | 0.000000000 |
| B | -10.678000000 | 12.695000000 | 0.000000000 |
| B | 10.657000000  | 14.869000000 | 0.000000000 |
| N | -4.406000000  | 13.421000000 | 0.000000000 |
| B | -13.188000000 | 12.695000000 | 0.000000000 |
| B | 8.147000000   | 14.869000000 | 0.000000000 |
| N | -6.916000000  | 13.421000000 | 0.000000000 |
| N | 14.419000000  | 15.595000000 | 0.000000000 |
| B | -15.698000000 | 12.695000000 | 0.000000000 |
| B | 5.637000000   | 14.869000000 | 0.000000000 |
| N | -9.426000000  | 13.421000000 | 0.000000000 |
| N | 11.909000000  | 15.595000000 | 0.000000000 |
| B | 3.127000000   | 14.869000000 | 0.000000000 |
| N | -11.936000000 | 13.421000000 | 0.000000000 |
| N | 9.399000000   | 15.595000000 | 0.000000000 |
| B | 0.617000000   | 14.869000000 | 0.000000000 |
| N | -14.446000000 | 13.421000000 | 0.000000000 |
| N | 6.889000000   | 15.595000000 | 0.000000000 |
| B | -1.893000000  | 14.869000000 | 0.000000000 |
| N | 4.379000000   | 15.595000000 | 0.000000000 |
| B | -4.403000000  | 14.869000000 | 0.000000000 |
| N | 1.869000000   | 15.595000000 | 0.000000000 |
| B | -6.913000000  | 14.869000000 | 0.000000000 |
| N | -0.641000000  | 15.595000000 | 0.000000000 |
| B | -9.423000000  | 14.869000000 | 0.000000000 |
| N | -3.151000000  | 15.595000000 | 0.000000000 |
| B | -11.933000000 | 14.869000000 | 0.000000000 |
| N | -5.661000000  | 15.595000000 | 0.000000000 |
| B | -14.443000000 | 14.869000000 | 0.000000000 |
| N | -8.171000000  | 15.595000000 | 0.000000000 |
| N | -10.681000000 | 15.595000000 | 0.000000000 |
| N | -13.191000000 | 15.595000000 | 0.000000000 |
| N | -15.701000000 | 15.595000000 | 0.000000000 |
| H | 0.618000000   | 4.974000000  | 0.000000000 |
| H | -1.892000000  | 4.974000000  | 0.000000000 |
| H | -4.618000000  | 0.251000000  | 0.000000000 |
| H | -3.363000000  | -1.922000000 | 0.000000000 |
| H | 2.088000000   | -1.921000000 | 0.000000000 |
| H | 3.343000000   | 0.252000000  | 0.000000000 |
| O | -3.201000000  | 4.033000000  | 0.000000000 |
| O | -4.456000000  | 1.859000000  | 0.000000000 |
| O | -1.896000000  | -2.579000000 | 0.000000000 |
| O | 0.614000000   | -2.579000000 | 0.000000000 |
| O | 3.374000000   | 1.971000000  | 0.000000000 |
| O | 2.087000000   | 4.127000000  | 0.000000000 |
| H | -3.434000000  | 1.271000000  | 0.000000000 |
| H | -2.179000000  | 3.445000000  | 0.000000000 |
| H | 1.066000000   | 3.537000000  | 0.000000000 |
| H | 2.353000000   | 1.381000000  | 0.000000000 |
| H | 0.614000000   | -1.400000000 | 0.000000000 |
| H | -1.896000000  | -1.400000000 | 0.000000000 |
